1                    **Structural basis of CHMP2A-CHMP3 ESCRT-III polymer assembly and membrane**  
2                    **cleavage**

3  
4    Kimi Azad<sup>1</sup>, Delphine Guilligay<sup>1</sup>, Cecile Boscheron<sup>1+</sup>, Sourav Maity<sup>2+</sup>, Nicola De Franceschi<sup>1,3+</sup>,  
5    Guidenn Sulbaran<sup>1</sup>, Gregory Effantin<sup>1</sup>, Haiyan Wang<sup>1</sup>, Jean-Philippe Kleman<sup>1</sup>, Patricia  
6    Bassereau<sup>3</sup>, Guy Schoehn<sup>1</sup>, Wouter H Roos<sup>2</sup>, Ambroise Desfosses<sup>1\*</sup>, Winfried Weissenhorn<sup>1\*</sup>

7  
8  
9    <sup>1</sup> Univ. Grenoble Alpes, CEA, CNRS, Institut de Biologie Structurale (IBS), Grenoble, France.

10    <sup>2</sup> Moleculaire Biofysica, Zernike Instituut, Rijksuniversiteit Groningen, Groningen, Netherlands.

11    <sup>3</sup> Institut Curie, Université PSL, Sorbonne Université, CNRS, Laboratoire Physico Chimie Curie,  
12    Paris, France.

13  
14    + contributed equally

15    \*Correspondence to: [ambroise.desfosses@ibs.fr](mailto:ambroise.desfosses@ibs.fr) and [winfried.weissenhorn@ibs.fr](mailto:winfried.weissenhorn@ibs.fr)

16  
17  
18  
19  
20  
21  
22  
23  
24  
25  
26  
27

## 28 **Abstract**

29 The endosomal sorting complex required for transport (ESCRT) is a highly conserved protein  
30 machinery that drives a diverse set of physiological and pathological membrane remodeling  
31 processes. However, the structural basis of ESCRT-III polymers stabilizing, constricting and  
32 cleaving negatively curved membranes is yet unknown. Here we present cryo electron microscopy  
33 structures of membrane-coated CHMP2A-CHMP3 filaments of two different diameters at 3.3 and  
34 3.6 Å resolution. The structures reveal helical filaments assembled by CHMP2A-CHMP3  
35 heterodimers in the open ESCRT-III conformation, which generates a partially positive charged  
36 membrane interaction surface, positions short N-terminal motifs for membrane interaction and the  
37 C-terminal VPS4 target sequence towards the tube interior. Inter-filament interactions are  
38 electrostatic, which facilitate filament sliding upon VPS4-mediated polymer remodeling.  
39 Fluorescence microscopy as well as high speed atomic force microscopy imaging corroborate that  
40 CHMP2A-CHMP3 polymers and VPS4 can constrict and cleave narrow membrane tubes, thus  
41 acting as a minimal membrane fission machinery.

42

43

## 44 **Introduction**

45 The endosomal sorting complex required for transport (ESCRT) machinery catalyzes  
46 many divergent membrane remodeling processes including the formation of multivesicular  
47 endosomes, cytokinesis, nuclear envelope reformation, membrane repair, autophagy, exosome  
48 biogenesis, neuronal pruning, dendritic spine maintenance, enveloped virus budding, release of  
49 peroxisomes and of recycling endosomes (Allison et al., 2013; Henne et al., 2013; Loncle et al.,  
50 2015; Mast et al., 2018; Olmos and Carlton, 2016; Sadoul et al., 2018; Scourfield and Martin-  
51 Serrano, 2017; Votteler and Sundquist, 2013; Zhen et al., 2021).

52 Common to all ESCRT-catalyzed processes in eukaryotes, archaea and bacteria is the  
53 recruitment of ESCRT-III proteins that polymerize to generate and/or to stabilize membranes with  
54 either flat, negatively or positively curved geometries (Bertin et al., 2020; Caillat et al., 2019; Gupta  
55 et al., 2021; Junglas et al., 2021; Liu et al., 2021; McCullough et al., 2018; Moser von Filseck et  
56 al., 2020; Pfitzner et al., 2021). The principal function of the polymers is to induce membrane  
57 constriction via outside-in fission of tubular structures with ESCRT-III protein coats on the outside  
58 of a membrane tube or inside-out fission with ESCRT-III polymers assembled within membrane  
59 neck/tube structures formed during vesicle and virus budding or at the cytokinetic midbody (Caillat  
60 et al., 2019; Harker-Kirschneck et al., 2022; McCullough et al., 2018; Nguyen et al., 2020; Pfitzner  
61 et al., 2021; Remec Pavlin and Hurley, 2020).

62 Humans express eight ESCRT-III proteins that can comprise several isoforms per  
63 member, corresponding to seven homologues in *S. cerevisiae* (in parentheses) named  
64 CHMP1A/B (Did2), CHMP2A/B (Vps2), CHMP3 (Vps24), CHMP4A/B/C (Snf7), CHMP5 (Vps60),  
65 CHMP6 (Vps20), CHMP7 and CHMP8/IST1 (Ist1) (McCullough et al., 2018). *S. cerevisiae*  
66 assembles two ESCRT-III subcomplexes, Vps20/Snf7 that in turn recruits Vps24/Vps2 (Babst et  
67 al., 2002) consistent with CHMP4 recruiting CHMP3 and CHMP2A (Morita et al., 2011). Notably,  
68 Vps24 (CHMP3) and Vps2 (CHMP2) have been suggested to block Snf7 (CHMP4) polymerization  
69 and cap ESCRT-III assembly prior to recycling (Saksena et al., 2009; Teis et al., 2008). Consistent  
70 with the idea of a core ESCRT-III, HIV-1 budding can be catalyzed with a minimal set of one  
71 CHMP4 and one CHMP2 isoform (Morita et al., 2011). Although CHMP3 is not strictly required,  
72 truncated versions thereof exert a potent dominant negative effect on HIV-1 budding (Zamborlini  
73 et al., 2006) and CHMP3 synergizes HIV-1 budding efficiency with CHMP2A but not with CHMP2B  
74 (Effantin et al., 2013). Thus ESCRT-III CHMP4, CHMP2 and CHMP3 constitute a minimal  
75 machinery that together with VPS4 catalyzes membrane fission from within membrane necks as  
76 suggested by *in vitro* reconstitution (Schoneberg et al., 2018).

77 ESCRT-III proteins adopt a closed conformation in the cytosol (Bajorek et al., 2009; Muziol  
78 et al., 2006; Xiao et al., 2009). Membrane recruitment via ESCRT-I, ESCRT-II or Alix/Bro1 (Im et  
79 al., 2009; McCullough et al., 2008; Pineda-Molina et al., 2006; Tang et al., 2016) is thought to  
80 induce ESCRT-III activation, which entails opening of the closed conformation (Lata et al., 2008a;  
81 Shim et al., 2007; Zamborlini et al., 2006) to an extended open polymerization-competent  
82 conformation as first shown for CHMP1B (McCullough et al., 2015). The CHMP1B polymer  
83 stabilizes positively curved membranes and can co-polymerize with IST1 in the closed  
84 conformation thereby forming an outer layer on top of the inner open conformation CHMP1B layer  
85 (McCullough et al., 2015), whose interplay leads to membrane tube thinning and cleavage (Cada  
86 et al., 2022; Nguyen et al., 2020).

87 CHMP4 homologues, Snf7 and shrub, adopt similar open conformations within crystalline  
88 polymers (McMillan et al., 2016; Tang et al., 2015). Notably *in vitro* CHMP4 polymers interact with  
89 flat membranes, (Chiaruttini et al., 2015; Mierzwa et al., 2017; Pires et al., 2009) and stabilize  
90 positively curved membranes in the presence of CHMP2A (Vps2) and CHMP3 (Vps24) (Bertin et  
91 al., 2020; Moser von Filseck et al., 2020). Furthermore, CHMP4 was proposed to interact with  
92 negatively curved membranes (Lee et al., 2015) and CHMP4 spirals have been imaged within  
93 membrane tubes *in vivo* (Cashikar et al., 2014; Hanson et al., 2008) leading to the model of  
94 ESCRT-III spiral springs assembling on flat membranes driving membrane deformation  
95 (Chiaruttini et al., 2015).

96 The conservation of the structural principle of the open ESCRT-III conformation is further  
97 underlined by the structures of plastid and bacterial membrane repair proteins Vipp1 and PspA,  
98 which both stabilize positively curved membranes and corroborate the conservation of the  
99 ESCRT-III machinery throughout all kingdoms of life (Gupta et al., 2021; Junglas et al., 2021; Liu  
100 et al., 2021).

101 While these structures demonstrate filament formation to stabilize positively curved  
102 membranes only low resolution models of filaments stabilizing negatively curved membranes have  
103 yet been imaged revealing single and multi-stranded polymers *in vitro* (Bajorek et al., 2009; Bertin  
104 et al., 2020; Chiaruttini et al., 2015; Dobro et al., 2013; Henne et al., 2012; Lata et al., 2008b;  
105 Mierzwa et al., 2017; Moriscot et al., 2011; Moser von Filseck et al., 2020; Pires et al., 2009) and  
106 *in vivo* (Bodon et al., 2011; Cashikar et al., 2014; Goliand et al., 2018; Guizetti et al., 2011; Hanson  
107 et al., 2008; Mierzwa et al., 2017; Sherman et al., 2016). Consistent with their central role in  
108 membrane fission catalyzed from within membrane necks, ESCRT-III CHMP2A and CHMP3 form  
109 helical tubular structures with defined diameters *in vitro*, which have been suggested to stabilize  
110 negative membrane curvature (Effantin et al., 2013; Lata et al., 2008b). VPS4 constricts these  
111 filaments producing dome-like end caps prior to complete polymer disassembly *in vitro* (Maity et  
112 al., 2019) in agreement with permanent ESCRT-III turn-over *in vivo* (Adell et al., 2014; Adell et al.,  
113 2017; Mierzwa et al., 2017). Notably, *S. cerevisiae* Vps2 and Vps24 form similar helical tubes that,  
114 however, seem to require Snf7 for polymerization (Henne et al., 2012).

115 Because most ESCRT-catalyzed processes act on negatively curved membranes to  
116 catalyze inside-out membrane fission, we set out to determine the structural basis of ESCRT-III  
117 stabilizing negatively curved membranes. We reconstituted CHMP2A-CHMP3 polymers within  
118 membrane tubes, solved their structure by cryo electron microscopy and show that VPS4 can  
119 indeed constrict CHMP2A-CHMP3 membrane tubes to the point of fission, corroborating that  
120 CHMP2A and CHMP3 form a minimal membrane fission complex powered by VPS4 and ATP.

121

## 122 **Results**

### 123 **Structure of the CHMP2A-CHMP3 polymer assembled within membrane tubes**

124 CHMP3 full length (residues 1-222) and C-terminally truncated CHMP2A (residues 1-161) were  
125 assembled into helical tubular structures as described (Lata et al., 2008b). After removal of the N-  
126 terminal tags, the tubular structures were coated with lipid bilayer, which tightly associated with  
127 the protein layer as shown by cryo electron microscopy (cryo-EM) (**Figure S1A**). 2D classification  
128 of the manually picked tube-like structures generated a dataset composed of 5 different diameters  
129 ranging from 380 Å to 490 Å, with the 410 Å (51.4%) and 430 Å (31.2%) diameters representing

130 the most populated classes (**Figure S1B**). The power spectra of the segments of the class  
131 averages of the two diameters (**Figures S1C and D**) were then employed to explore possible  
132 helical symmetries and combined with helical real-space reconstruction (He and Scheres, 2017)  
133 to validate the symmetry parameters. This revealed that the 410 Å and 430 Å diameter tubes are  
134 formed by elementary helices composed of respectively 6.3 and 6.6 units per turn with a small  
135 pitch of 9 Å for the 410 Å diameter and 18 Å for the 430 Å diameter. The latter displays an  
136 additional C2 symmetry around the helical axis, explaining the doubling of the pitch (**Figures S1C**  
137 **and D**). Although, the asymmetric units along the elementary helix are not biochemically  
138 connected, they translate into filaments with extended interaction surfaces between subsequent  
139 asymmetric units. The symmetry parameters of the filaments are relatively similar for both  
140 diameters (Rise/Twist of 8.227 Å /16.877° and 8.641 Å /17.701° for the 410 Å and 430 Å  
141 diameters, respectively), and therefore likely represent the preferred polymerization mode of the  
142 repeating unit, the CHMP2A-CHMP3 heterodimers (**Figures S1C and D**).

143 Six filaments (2\*3 in the case of the C2 symmetric helix) form left-handed six-start helices  
144 with helical pitches of ~175 Å for both diameters (**Figures 1A and B**). The 430 Å filament is  
145 composed of 21.33 units per turn (**Figures 1A and B**) and the 410 Å filament contains 20.33 units  
146 per turn (**Figures 1C and D**), indicating a helical repeat after three turns and similar inter-filament  
147 interactions along the helical axis. Comparison of the 430 and 410 Å demonstrates that removal  
148 of one heterodimer reduces the tube diameter by 20 Å.

149 The three-dimensional (3D) helical reconstruction shows an overall resolution of 3.6 Å for  
150 the 410 Å and 3.3 Å for the 430 Å diameter (**Figure 1; Figure S2 and Figure S3A**) with local  
151 resolutions ranging from 3.3 Å to 4.6 Å for the 430 Å diameter and 3.6 to 5.2 Å for the 410 Å  
152 diameter (**Figure S3B and C**). The map of the 430 Å diameter was employed (**Figure 1E**) to build  
153 the atomic model of the repeating unit of the filament, formed by the CHMP2A-CHMP3  
154 heterodimer revealing both protomers in the open ESCRT-III conformation (**Figure 1F and Figure**  
155 **S3D, Table S1**).

156 Comparison of the closed (Bajorek et al., 2009; Muziol et al., 2006) and open CHMP3  
157 conformations showed the conformational transitions upon CHMP3 activation, which involves  
158 extension of the helical hairpin (residues P12-A101) that is identical in both conformations (r.m.s.d.  
159 of 1.082 Å) by a linker and helix 3 (L117). The following short connection forms an elbow and  
160 translates helix 4 by ~10 Å positioning helix 4 in a 140° angle with respect to the hairpin axis. Helix  
161 4 is composed of the closed conformation helix 4 and most of the disordered linker connecting to  
162 helix 5 via a 90° kink at positions M151 to D152 (**Figure 2A**). The remaining CHMP3 residues 170  
163 to 220 are flexible and disordered in the structure. Both CHMP3 and CHMP2A open conformations

164 are similar as superposition of their C $\alpha$  atoms revealed an r.m.s.d. of 0.934 Å (**Figure S4A**),  
165 suggesting that CHMP2A can fold into the same closed conformation structure as CHMP3.

166 The repeating unit of the filament is the CHMP2A-CHMP3 heterodimer formed by parallel  
167 interaction of their hairpins with the CHMP2A hairpin tip shifted by six helical turns with respect to  
168 CHMP3 (**Figure 2B**). The heterodimer interaction covers 2026 Å<sup>2</sup> of CHMP2A and 1997 Å<sup>2</sup> of  
169 CHMP3 surfaces involving 55 and 51 interface residues, respectively. The structure of the  
170 heterodimer was further confirmed by mutagenesis. Introducing pairs of cysteine demonstrated  
171 that CHMP2A\_D57C together with CHMP3\_S75C and CHMP2A\_N18C together with  
172 CHMP3\_V110C (**Figure S5A**) assembled into disulfide-linked heterodimers upon polymerization  
173 into tube-like structures as shown by SDS-PAGE analyses and negative staining EM (**Figure S5B**  
174 **and C**). Furthermore, mutagenesis of CHMP2A-CHMP3 interface residues (**Figure S5D**)  
175 prevented polymerization as expected (**Figure S5E**). The principle of the heterodimer hairpin  
176 stacking is employed to assemble the filament, which is further stabilized by lateral interactions of  
177 CHMP3<sub>i</sub> elbow helix 4 with CHMP2A<sub>i</sub>, CHMP3<sub>i+1</sub> and CHMP2A<sub>i+1</sub>. In addition, CHMP3<sub>i</sub> helix 5  
178 interacts with the tip of the CHMP3<sub>i+2</sub> hairpin (**Figure 2B**), as observed in the closed conformation  
179 (**Figure 2A**) (Bajorek et al., 2009; Muziol et al., 2006). Similar to CHMP3, CHMP2A helix 4 exerts  
180 the same domain exchange interactions (**Figure 2B**). C $\alpha$  superposition of the open CHMP3  
181 conformation revealed the closest match with the *S. cerevisiae* Snf7 protomer (**Figure S4B**) and  
182 considerable differences with CHMP1B, Vipp1, PspA and Vps24 (Gupta et al., 2021; Huber et al.,  
183 2020; Junglas et al., 2021; Liu et al., 2021; McCullough et al., 2015) (**Figure S4C-F**). Notably,  
184 different hairpin interactions and orientations of the helical arms upon polymerization determine  
185 the filament geometry that leads to positively curved membrane interaction by CHMP1B, Vipp1  
186 and PspA (Gupta et al., 2021; Junglas et al., 2021; Liu et al., 2021; McCullough et al., 2015)  
187 underlining the extensive structural plasticity of ESCRT-III proteins.

188

### 189 **CHMP2A-CHMP3 polymer interaction with membrane**

190 The CHMP2A-CHMP3 polymer is tightly associated with the lipid bilayer (**Figure S1E**) and both  
191 CHMP2A and CHMP3 expose the same regions to the membrane. The polymerization mode  
192 positions the N-terminal regions of both CHMP2A and CHMP3 at the membrane interface.  
193 Although CHMP3 residues 1-10 and CHMP2A residues 1-7 are disordered, they are both oriented  
194 by conserved prolines towards the lipid bilayer (**Figure 3A**) consistent with previous suggestions  
195 that short amphipathic N-terminal helices insert into the bilayer (Bodon et al., 2011; Buchkovich et  
196 al., 2013). The main membrane interaction surfaces locate to the elbow formed by helices 3 and  
197 4 (residues K104 to R131) exposing six basic residues of CHMP2A (K104, K108, R115, K118,

198 K124, R131) and five basic residues of CHMP3 (K106, K112, K119, K132, K136) prone to interact  
199 with negative charges of the membrane (**Figure 3B**). The electrostatic potential map shows in  
200 addition to the stretch of basic surfaces some negative and non-charged regions of the outer  
201 polymer surface (**Figure 3C**). Most of the basic residues are conserved in *S. cerevisiae* Vps2 and  
202 Vps24 (**Figure S6A**). Notably, alanine mutagenesis of some CHMP3 basic residues within the  
203 membrane interaction surface did not interfere with CHMP2A-CHMP3 polymerization *in vitro*  
204 (**Figure S7A**) nor did they affect the dominant negative effect of C-terminally truncated CHMP3  
205 on VLP release (**Figure S7B**), indicating that membrane binding is complex and not only  
206 electrostatic, consistent with plasma membrane localization of the CHMP3 mutant (**Figure S7C**).  
207

### 208 **Inter-filament interactions**

209 Conserved basic helix 1 residues of CHMP2A and CHMP3 (**Figure S6A**) are at the filament  
210 interface opposed by a stretch of conserved acidic residues within helices 4 and 5 (**Figure S6A**)  
211 of neighboring filaments (**Figure 3D**), which indicate electrostatic inter-filament interactions  
212 (**Figure 3C**). Mutation of the helix 1 basic cluster within either CHMP2A or CHMP3 prevented  
213 polymer formation *in vitro* (**Figure S7D**), indicating that the basic charge of helix 1 is important for  
214 filament polymerization, which is in line with mutagenesis of a similar cluster of basic residues  
215 within helix 1 of CHMP3 abolishing its dominant negative effect on HIV-1 budding (Muziol et al.,  
216 2006). To further test the electrostatic inter-filament interactions, we exposed the helical tubular  
217 CHMP2A-CHMP3 polymers to high ionic strength. This led to the partial unwinding of the filaments  
218 producing single and multi-stranded filaments (**Figure S8A-E**) in agreement with the presence of  
219 single and multi-start helices upon CHMP2A-CHMP3 polymerization *in vitro* (Effantin et al., 2013).  
220 We suggest that these electrostatic interactions between filaments enable filament sliding upon  
221 VPS4-catalyzed remodeling. The acidic cluster in helices 4 and 5 is conserved in CHMP4A, B, C,  
222 CHMP5 and CHMP6 (**Figure S6B**) indicating potential similar involvement in inter-filament  
223 interaction for the formation of mixed filaments. Notably, the acidic cluster is not conserved in  
224 CHMP1A and B, which stabilizes positively curved membranes via basic charges present on the  
225 inside of the protein tube-like polymer (McCullough et al., 2015). We therefore suggest that the  
226 acidic cluster is a hallmark of ESCRT-III stabilizing negatively curved membrane structures.  
227

### 228 **VPS4 remodels and cleaves CHMP2A-CHMP3 membrane tubes**

229 We next tested whether VPS4B can remodel the CHMP2A-CHMP3 membrane coated tubes as  
230 we have shown before for CHMP2A-CHMP3 tubes without membrane (Maity et al., 2019). When  
231 we incubated CHMP2A-CHMP3 and VPS4B containing membrane tubes (**Figure S9A**) with ATP

232 and  $Mg^{2+}$ , complete disassembly of the tubes was observed (**Figure S9B and C**). In order to image  
233 tube remodeling by fluorescence microscopy, VPS4B and caged ATP were incorporated into the  
234 tubes wrapped with fluorescently labelled membrane. Imaging of tubes containing either only  
235 caged ATP (**Figures 4A and B; movie 1; Figures S10A and B; movie 2**) or only VPS4B (**Figures**  
236 **4C and D; movie 3**) demonstrated that photolysis used to uncage ATP did not affect the tube  
237 structure. However, tubes containing both caged ATP and VPS4B revealed constriction and tube  
238 cleavage upon ATP activation at different sites starting at 30s leading to complete disassembly  
239 within 270s (**Figures 4E and F; movie 4**) or starting at 69s (**Figures S10C and D; movie 5**) or  
240 50 s (**movie 6**).

241 Tube cleavage was further confirmed by high-speed AFM (HS-AFM) imaging. First,  
242 CHMP2A-CHMP3 tubes with and without membrane were imaged (**Figures S11A-C**). A  
243 comparative height histogram showed an increase in tube height of ~8 nm for the membrane  
244 coated tubes (**Figure S11D**), as expected for an unilamellar membrane coating. Next, membrane-  
245 coated tubes loaded with 10  $\mu$ M caged ATP with and without UV exposure (**Figure S11E; movie**  
246 **7**) were recorded by HS-AFM. In the absence of VPS4B, photolysis of the caged ATP did not  
247 induce changes in tube morphology, consistent with the observations using fluorescence  
248 microscopy. Further, no changes in tube morphology were observed without UV exposure for an  
249 extended period of time of CHMP2A-CHMP3 tubes coated with membrane and loaded with  
250 VPS4B and caged ATP (**Figure 5A, movie 8**). However, upon UV exposure, constriction and  
251 cleavage of the membrane coated tubes was observed (**Figure 5B; movie 9**). Kymographs along  
252 the tube cross section (**Figure 5C**) and the evolution of the height at the constriction sites over  
253 time (**Figure 5D**) reveal that complete cleavage of the membrane tube occurs within a time period  
254 of ~ 200 s of UV exposure. We conclude that VPS4B can constrict the CHMP2A-CHMP3 filaments  
255 bound to membranes that leads to membrane cleavage, reminiscent of membrane fission.

256

## 257 **Discussion**

258 The structure of the CHMP2A-CHMP3 heteropolymer demonstrates how ESCRT-III  
259 filaments polymerize into rigid structures that can stabilize and/or shape negatively curved  
260 membrane necks with diameters of approximately 50 nm. Such membrane structures are present  
261 at many ESCRT-catalyzed processes including vesicle and virus budding or at later stages during  
262 cytokinetic midbody constriction (McCullough et al., 2018; Vietri et al., 2020). Although the  
263 structural principles of the open ESCRT-III conformation are highly conserved between  
264 CHMP2A/CHMP3 and CHMP1B (McCullough et al., 2015), Snf7/Shrub (CHMP4) (McMillan et al.,  
265 2016; Tang et al., 2015) and bacterial PspA and Vipp1 (Gupta et al., 2021; Junglas et al., 2021;



266 Liu et al., 2021), differences in helical hairpin stacking and orientations of the helical arms dictates  
267 the geometry of the filaments that stabilize positively curved membrane or negatively curved  
268 membrane as in case of CHMP2A-CHMP3 polymerization. Furthermore, assembly modes of  
269 ESCRT-III monomers can vary as shown for CHMP2A, CHMP3 and CHMP4B, which can yet  
270 adapt another filament geometry that stabilizes positively curved membranes (Bertin et al., 2020;  
271 Moser von Filseck et al., 2020). Thus the plastic nature of ESCRT-III protein conformations can  
272 lead to variable ESCRT-III filament geometries that can adapt a wide range of curvatures to  
273 accommodate ESCRT function in different membrane remodeling processes (Pfitzner et al.,  
274 2021).

275 A striking feature of the CHMP2A-CHMP3 polymer is the narrow range of tube diameters,  
276 indicative of a late recruitment during the constriction process. During yeast MVB biogenesis,  
277 Vps24/Vps2 (CHMP3/CHMP2) is indeed recruited last prior to complete ESCRT-III disassembly  
278 and probably completion of fission (Babst et al., 2002; Saksena et al., 2009; Teis et al., 2008).  
279 Likewise, CHMP4 isoforms recruit CHMP3 and CHMP2A to HIV-1 budding sites (Johnson et al.,  
280 2018; Morita et al., 2011; Prescher et al., 2015). The narrow range of diameters of the CHMP2A-  
281 CHMP3 polymer structure suggests that recruitment of CHMP3 and CHMP2A molds membrane  
282 necks into approximately 40 to 50 nm diameters, which sets the stage for further constriction.  
283 Comparison of the 410 and 430 Å wide structures shows that removal of only one CHMP2A-  
284 CHMP3 heterodimer per filament turn reduces the tube diameter by 20 Å, indicating how a  
285 stepwise removal of heterodimers can successively induce membrane constriction.

286 Another feature of the tubular polymer is that it can assemble from single or multi-stranded  
287 filaments (Effantin et al., 2013) the latter being the preferred assembly *in vitro*. Interaction between  
288 filaments is driven by complementary positive and negative charges. However, surprisingly, high  
289 ionic strength did not disassemble the tube consistently into individual filaments but partially  
290 preserved the multi-strand architecture *in vitro*. The 17.5 nm width of the six-stranded helix present  
291 in the structure fits the 17 nm wide helices imaged at the midbody (Guizetti et al., 2011),  
292 suggesting that such spirals contain six ESCRT-III filaments. Since inter-filament interactions are  
293 electrostatic, different ESCRT-III filaments may contribute to the formation of mixed multi-stranded  
294 filaments (Mierzwa et al., 2017; Pfitzner et al., 2020). In line, acidic residues within helix 4 and  
295 basic residues within helix 1 have been implicated in *S. cerevisiae* Snf7-Vps24 interaction  
296 (Banjade et al., 2019). Because basic and acidic charges within these regions are conserved in  
297 CHMP6, CHMP4A, B, C, CHMP2B and CHMP5, filaments thereof may also form side by side via  
298 homo- or hetero-filament assembly. The loose electrostatic inter-filament interactions likely  
299 facilitate sliding of filaments upon ESCRT-III filament remodeling by VPS4, which catalyzes

300 filament constriction prior to complete disassembly (Maity et al., 2019). Notably, dynamic VPS4-  
301 mediated turnover of ESCRT-III has been proposed in different membrane remodeling processes  
302 (Adell et al., 2014; Adell et al., 2017; Mierzwa et al., 2017).

303 CHMP2A-CHMP3 polymers have been suggested to interact with negatively charged  
304 membranes (De Franceschi et al., 2018; Lin et al., 2005; Whitley et al., 2003), which is confirmed  
305 by the cluster of basic residues within the membrane interaction surface. Furthermore, the  
306 structure indicates that short N-terminal hydrophobic motifs, implicated in ESCRT-III function  
307 (Bodon et al., 2011) (Buchkovich et al., 2013) are positioned to insert into the membrane. Although  
308 this N-terminal motif is helical in a filament structure assembled by an intermediate Vps24  
309 (CHMP3) conformation (Huber et al., 2020), the corresponding helices of CHMP2A and CHMP3  
310 are not visible in the membrane-bound structure suggesting that the putative amphipathic helices  
311 can adopt different membrane insertion angles. Polymer interaction with membrane is tight, which  
312 excludes other membrane proteins thereby serving as a diffusion barrier (De Franceschi et al.,  
313 2018).

314 CHMP3 is dispensable for HIV-1 budding (Morita et al., 2011) and *S. cerevisiae* Vps24 can  
315 be substituted by Vps2 overexpression restoring partial endosomal cargo sorting (Banjade et al.,  
316 2021). Both processes depend on CHMP2A and Vps2 interaction with CHMP4 or Snf7 (Teis et  
317 al., 2008) (Morita et al., 2011). The structure suggests that CHMP3 can be structurally replaced  
318 by CHMP2A in the polymer, indicating that CHMP2A filaments on their own may form similar  
319 helices. Although CHMP2A can polymerize into circular filaments with approximate diameters of  
320 40 nm that often coil up, no regular CHMP2A tube-like structures have been yet imaged *in vitro*  
321 (Effantin et al., 2013).

322 VPS4B remodels CHMP2A-CHMP3 helical tubular structures *in vitro* (Caillat et al., 2015;  
323 Lata et al., 2008b) inducing filament constriction and cleavage that generates dome-like end caps  
324 prior to complete disassembly, which was proposed to drive membrane fission (Fabrikant et al.,  
325 2009; Maity et al., 2019). Here, we show that VPS4B constricts and cleaves CHMP2A-CHMP3  
326 membrane-coated tubes via membrane fission likely via the formation of dome-like end-caps  
327 (Maity et al., 2019). Cleavage of membrane tubes pulled from GUVs has been reported previously  
328 by employing a minimal system composed of *S. cerevisiae* Snf7, Vps24, Vps2 and Vps4  
329 (Schoneberg et al., 2018), while another model proposed sequential recruitment of *S. cerevisiae*  
330 Snf7, followed by Vps2-Vps24, Vps2-Did2 and Did2-Ist1 for final constriction (Pfitzner et al., 2020).  
331 Our data suggest that CHMP2A-CHMP3 filaments constitute together with VPS4 a minimal  
332 ESCRT-III membrane fission machinery that can constrict membrane necks with 40 to 50 nm large  
333 diameters to the point of fission. It is yet unclear how many helical turns are required for

334 constriction *in vivo*, although more than one, as estimated from imaging (Adell et al., 2017), would  
335 allow filament sliding powered by ATP-driven forces that can drive filament-induced membrane  
336 constriction and cleavage. Finally, catalyzing membrane fission with a minimal machinery is well  
337 in line with ancestral ESCRT-III function (Caspi and Dekker, 2018; Ithurbide et al., 2022).

338

## 339 **Methods**

340

### 341 **Expression and purification**

342 CHMP2A $\Delta$ C containing residues 1 to 161 was subcloned in a pMAL-c5X vector with an additional  
343 TEV site at the amino terminal end and expressed as a MBP fusion protein in the C41 (DE3) *E.*  
344 *coli* bacterial strain (Lucigen). Expression was induced for 1h at 37°C. Bacteria were lysed by  
345 sonication in a buffer containing 50 mM HEPES pH 7.5, 300 mM NaCl, 1 mM DTT, 5 mM EDTA  
346 and protease inhibitors. Cleared lysate was applied onto an amylose resin (New England Biolabs),  
347 washed with buffer A (25mM HEPES 7.5, 150 mM NaCl, 1mM DTT), then with Buffer B (25 mM  
348 HEPES pH 7.5, 1 M NaCl, 1 M KCl, 1mM DTT) followed by a last wash with Buffer A. Finally,  
349 protein was eluted with buffer C (25 mM HEPES 7.5, 150 mM NaCl, 10 mM maltose). The most  
350 concentrated fraction was directly applied to size exclusion chromatography (SEC) Superdex 200  
351 column (GE Healthcare) in buffer D (25 mM HEPES pH 7.5, 150 mM NaCl).

352 Full-length CHMP3 was subcloned in a pProEX-HTb vector (Life Technologies, Thermo Fisher)  
353 and expressed in BL21Gold (DE3) *E. coli* bacterial strain (Agilent). Expression was induced for 3h  
354 at 37°C and purified as described (Lata et al., 2008b) with minor modifications. Bacteria were  
355 lysed by sonication in buffer E (25 mM HEPES pH 7.5, 150 mM NaCl, 10mM imidazole) containing  
356 protease inhibitors and the cleared lysate was applied onto a Ni<sup>2+</sup>-chelating sepharose (Cytiva),  
357 washed extensively with lysis buffer E, and subsequently with buffer F (25 mM HEPES pH 7.5,  
358 300 mM NaCl, 300 mM KCl, 20 mM imidazole) and buffer G (25 mM HEPES pH 7.5, 300 mM  
359 NaCl, 300 mM KCl, 50 mM imidazole). Finally, CHMP3 was eluted with buffer H (25 mM HEPES  
360 7.5, 150 mM NaCl, 350 mM imidazole) and cleaved overnight at 4°C with Tobacco Etch Virus  
361 (TEV) protease at 1:100 (w/w) ratio in the presence of 10 mM  $\beta$ -mercaptoethanol. Cleaved protein  
362 was then applied on a second Ni<sup>2+</sup>-chelating sepharose in order to remove TEV, the His-tag and  
363 uncleaved protein. The final step included size exclusion chromatography (SEC) on a Superdex  
364 75 column (GE Healthcare) in buffer D. CHMP3 concentrated at 300  $\mu$ M was frozen for further  
365 use.

366 CHMP2A $\Delta$ C-mutants containing residues 9 to 161 and CHMP3-mutants containing residues 9 to  
367 183 were synthesized (ThermoFisher), subcloned in a pETM40 vector (PEPcore facility-EMBL

368 Heidelberg) and the pProEX-HTb (ThermoFisher) vector, respectively. Mutants were expressed  
369 and purified as described above for wild type sequences.

370

### 371 **CHMP2A-CHMP3 membrane tube generation**

372 For helical tube formation as described previously (Lata et al., 2008b), 10  $\mu$ M CHMP2A $\Delta$ C was  
373 mixed with 20  $\mu$ M full-length CHMP3 and incubated for 48-72h at 4°C. After incubation, tubes  
374 were harvested by centrifugation at 20,000g for 30min and the pellet containing CHMP2A $\Delta$ C-  
375 CHMP3 tubes was resuspended in buffer D. In order to wrap the CHMP2A $\Delta$ C-CHMP3 tubes with  
376 a lipid bilayer, the following lipid film was produced containing 70% Egg phosphatidyl choline (Egg  
377 PC), 10% dioleoyl glycerol phosphoserine (DOPS), 10% dioleoyl glycerol phosphoethanolamine  
378 (DOPE), 10% brain phosphatidylinositol-4,5-bisphosphate (PI(4,5)P2) and 2 $\mu$ L of dioleoyl-sn-  
379 glycerol-3-phosphoethanolamine-N-(lissamine rhodamine B sulfonyl) (LISS-Rhodamin PE) (all  
380 Avanti Polar lipids). The lipid film was resuspended in water at a final concentration of 5 mg/mL.  
381 The CHMP2A $\Delta$ C-CHMP3 tubes (25  $\mu$ L) were mixed with 25  $\mu$ L of 2% CHAPS, 25  $\mu$ L of lipids and  
382 0.1 mg/mL of TEV protease (to remove the MBP from CHMP2A $\Delta$ C) and incubated at room  
383 temperature for 2h. To remove free lipids/micelles and CHAPS, the tubes were dialyzed twice for  
384 48-72h against buffer I (25mM Tris pH 7.4, 25 mM NaCl, 1 mM  $\beta$ -mercaptoethanol and 0.5 g of  
385 Bio-Beads (Biorad). After dialysis, CHMP2A $\Delta$ C-CHMP3 tubes wrapped with bilayer were  
386 incubated with Bio-Beads overnight at 4°C and removed by centrifugation. The quality of the  
387 bilayer wrapped CHMP2A $\Delta$ C-CHMP3 tubes was assessed by negative staining EM prior to cryo-  
388 EM data collection, fluorescence microscopy imaging and HS-AFM analysis.

389 To test remodeling by VPS4, CHMP2A-CHMP3 tubes were incubated with 10 to 20  $\mu$ M VPS4B, 5  
390 mM MgCl<sub>2</sub> and 5 or 10 mM caged ATP (#A1048 Invitrogen) prior to membrane wrapping, following  
391 the protocol described above. Because deposition of the membrane onto the CHMP2A-CHMP3  
392 protein coat requires extensive dialysis, the final VPS4 concentration present within the tubes can  
393 be only estimated from SDS-PAGE; however, the final concentration of caged ATP inserted into  
394 the tubes cannot be determined.

395

### 396 **CHMP2A-CHMP3-VPS4 membrane tube imaging**

397 Epifluorescence video microscopy of CHMP2A-CHMP3 membrane tubes containing VPS4B and  
398 caged ATP was performed using an Olympus IX83 optical microscope equipped with a UPFLN  
399 100X O-2PH/1.3 objective and an ORCA-Flash4.0 Digital sCMOS camera (Hamamatsu). A 5  $\mu$ L  
400 aliquot of ESCRT-III tube suspension was spread on a slide, covered with a glass coverslip (#1)  
401 and sealed with twinstil speed 22 (Picodent, ref 13001002) for imaging. Caged-ATP was uncaged

402 using a 10s 10% 365-nm LED illumination (**Figures 4A-F and movies S1-4**) or using at each time  
403 point a 100ms 30% 365-nm LED illumination (**Figure S10 and movies S5 and S6**). ESCRT tubes  
404 were fluorescently imaged using a 550nm LED (10% with an exposure time of 100ms) at 1 frame/s.  
405 Images were acquired using the Volocity software package. Images were analyzed, adjusted, and  
406 cropped using ImageJ software.

407  
408 **HS-AFM analysis**  
409 The AFM images were acquired in amplitude modulation tapping mode in liquid, using high-speed  
410 atomic force microscopes (RIBM, Japan) (Maity et al., 2019; Maity et al., 2020). The HS-AFM  
411 imaging was performed using USC-F1.2-k0.15 cantilevers (NanoWorld, Switzerland), an  
412 ultrashort cantilever with a nominal spring constant of 0.15 N/m and a resonance frequency  $\approx$  0.5  
413 MHz. All HS-AFM recordings were done at room temperature and in buffer D. Uncaging of the  
414 caged ATP was performed by directly irradiating 365 nm UV light at the AFM sample stage using  
415 an optical fiber. The membrane coated tubes were immobilized at the surface using streptavidin  
416 on top of a lipid bilayer (DOPC) on mica containing 0.01% biotinylated lipid (Keya et al., 2017).  
417 HS-AFM images were analyzed using Igor Pro, and ImageJ with additional home written plugins  
418 (Maity et al., 2022). Height measurements were performed on raw images after tilt correction.

419  
420 **Dominant negative effect of CHMP3(1-150) wild type and mutants**  
421 CHMP3 residues 1-150 wt or mutants were synthesized (ThermoFisher) and cloned into the  
422 pEGFP-N1 vector using restriction sites *Xho1-HindIII*. To determine the effect of GFP-CHMP3 (1-  
423 150) on virus like particle (VLP) production upon HIV-1 Gag expression, 293T cells were seeded  
424 into 10mm dishes and transfected 24 hr later using a Jetprime (Polyplus) technique. The cultures  
425 were co-transfected with 0.5  $\mu$ g of Rev-independent HIV-1 Gag construct and with 2  $\mu$ g of either  
426 pcDNA or wild type and mutant versions of GFP-CHMP3(1-150). Twenty-four hours post  
427 transfection, VLPs released into the culture medium were pelleted through sucrose. HIV-1 Gag  
428 proteins in VLPs and cell lysates were detected by Western blotting with a mouse anti-p24  
429 antibody (183-H12-5C). For life cell imaging cells were seeded in glass bottomed  $\mu$ -dishes and  
430 co-transfected with 0.8  $\mu$ g of Rev-independent HIV-1 Gag construct, 0.2  $\mu$ g of Gag-mCherry  
431 (Jouvenet et al., 2008) and with 1  $\mu$ g of either wild type or mutant GFP-CHMP3(1-150). ESCRT-  
432 III and Gag protein localization was analyzed by spinning disc confocal microscopy 24 hr post  
433 transfection in HeLA cells.

434

### 435 **Cryo-EM sample preparation and data collection**

436 *Cryo-electron microscopy*. 3.5  $\mu\text{L}$  of sample were applied to glow discharged (45s 30 mA) 1.2/1.3  
437 Ultrafoil holey grids (Quantifoil Micro Tools GmbH, Germany) and they were plunged frozen in  
438 liquid ethane with a Vitrobot Mark IV (Thermo Fisher Scientific) (100% humidity, temperature 20°C,  
439 6 s blot time, blot force 0). The grids were pre-screened on the 200kV Glacios electron microscope  
440 (Thermo Fisher Scientific) at the IBS (Grenoble) and data were collected at the beamline CM01  
441 of the ESRF (Grenoble, France) (Kandiah et al., 2019) on a Titan Krios G3 (Thermo Fischer  
442 Scientific) at 300 kV equipped with an energy filter (Bioquantum LS/967, Gatan Inc, USA) (slit  
443 width of 20 eV). 5028 movies were recorded automatically on a K2 summit direct detector (Gatan  
444 Inc., USA) with EPU (Thermo Fisher Scientific) for a total exposure time of 5 s and 200 ms per  
445 frame resulting in 25 frame movies with a total dose of  $\sim 24 \text{ e}^-/\text{\AA}^2$ . The magnification was 130,000x  
446 ( $1.052 \text{ \AA}/\text{pixel}$  at the camera level). The defocus of the images was adjusted between  $-0.5$  and  
447  $-1.5 \mu\text{m}$  in  $0.2 \mu\text{m}$  steps. For the high ionic strength unwinding of the CHMP2A-CHMPA filament  
448 the same grid and freezing conditions have been used as described above and images have been  
449 recorded on the Glacios electron microscope using a K2 direct electron detector.

450

### 451 **EM image analysis and 3D reconstructions**

452 The workflow of the image analysis is shown in **Figure S2**. Electron beam-induced sample motion  
453 on the recorded movie frames was corrected using MotionCor2 (Zheng et al., 2017) and the  
454 contrast transfer function (CTF) was estimated with CTFFIND4 (Rohou and Grigorieff, 2015).  
455 9,207 filaments were manually picked from 5,027 micrographs using the EMAN2 program  
456 e2helixboxer.py (Tang et al., 2007). All subsequent data processing steps were carried out in  
457 RELION3 (Scheres, 2012; Zivanov et al., 2018) unless mentioned otherwise. Initially, 89,122  
458 overlapping segments were extracted with  $\sim 90\%$  overlap between boxes of  $768 \times 768$  pixels and  
459 down sampled to a pixel size of  $2.104$  for initial classification steps. Several rounds of 2D  
460 classification resulted in class averages that could be classified into 5 main different groups based  
461 on the filament diameter, without membrane ( $380 \text{ \AA}$  diameter (7.4%),  $410 \text{ \AA}$  diameter (51.4%),  
462  $430 \text{ \AA}$  diameter (31.2%),  $470 \text{ \AA}$  diameter (1.9%) and  $490 \text{ \AA}$  diameter (0.3%)). In order to  
463 compensate for potential mis-assignment of diameters to the segments due to inaccuracies in 2D  
464 classification, we assigned to each entire tube a diameter based on the class assignment of the  
465 corresponding segments. If more than 80% of segments of a particular tube were belonging to  
466 classes assigned to a particular diameter, this entire tube would be assigned this diameter for the  
467 subsequent steps. After re-extraction of segments with  $\sim 95\%$  overlap, another round of 2D  
468 classification was performed for each diameter group. Most populated 2D classes with filament

469 diameter of 430 Å and 410 Å were chosen for further processing and analysis. For determination  
470 of helical symmetry, the sum of power spectra from a smaller subset (1,904 and 3,993 segments  
471 from one 2D class each for 430 Å and 410 Å respectively) was calculated for both filament groups.  
472 The resulting average power spectrum (**Figures S1C and D**) was analyzed for estimation of  
473 helical symmetry parameters using the web tool helixplorer (<http://rico.ibs.fr/helixplorer/>). Based  
474 on a prior visual inspection of the PS, we made following hypotheses: the layer line with a  
475 maximum seemingly on the meridian could be the helical rise or the pitch (given the large diameter  
476 of the tube and possibilities that selected 2D class averages contained a number of slightly out-  
477 of-plane tilted segments). Given those two hypotheses, and allowing any cyclic symmetries, we  
478 explored possible helical symmetries matching the experimental PS, giving a list of 20 and 15  
479 symmetries to test for the 430 Å and 410 Å diameter classes, respectively. Those symmetries  
480 were applied on the real-space 2D class-averages using SPRING program  
481 segclassreconstruct.py (Desfosses et al., 2014) in order to generate initial models and narrowing  
482 down possible symmetry solutions to 14 and 10, by discarding those giving aberrant density  
483 distribution. Using those initial models, each of the remaining symmetry solutions was tested for  
484 3D refinement in RELION3, and the resulting maps inspected for high-resolution features such as  
485 clear secondary structures, allowing to determine the helical parameters to be 18 Å pitch, 2.72 Å  
486 rise, 54.39° twist, 6.6 units/turn and C2 point symmetry for 430 Å, and 9 Å pitch, 1.43 Å rise, 57°  
487 twist, 6.3 units/turn and C1 point symmetry for 410 Å diameter filaments.

488 In order to select a more homogeneous subset of segments, we applied 3D classification and the  
489 classes (containing 25,353 and 11,396 segments for diameters 430 and 410 Å) were chosen for  
490 a final round of 3D auto-refine reconstruction that converged to a 2.74 Å rise and 54.37° twist for  
491 430 Å, and 1.44 Å rise and 57.04° twist for 410 Å diameter filaments. Using soft protein-only  
492 masks, the final resolutions were estimated at 3.3 Å and 3.6 Å for the 430 Å and 410 Å diameter  
493 filaments, at the FSC (Fourier shell correlation) 0.143 cutoff criterion (Rosenthal and Henderson,  
494 2003). The maps were sharpened with b-factors of -96.57 Å<sup>2</sup> (430 Å) and -101.52 Å<sup>2</sup> (410 Å). Local  
495 resolution was estimated in RELION3 (Scheres, 2012) and the density maps were rendered in  
496 UCSF Chimera (Pettersen et al., 2004). The statistics of the EM map are summarized in **Table**  
497 **S1**.

498

### 499 **Atomic modelling and validation**

500 The SWISS-MODEL (Waterhouse et al., 2018) server was used to create homology models of  
501 human CHMP3 and CHMP2A, using the open conformation of CHMP1B (PDB ID 6TZ4) as a  
502 reference model. Helices with residues 15-52, 57-117 and 120-151 for CHMP3 and 14-51, 56-116

503 and 119-150 for CHMP2A were initially fit into the EM density as separate rigid bodies using  
504 Chimera and then adjusted in Coot (Emsley et al., 2010). Further, the rest of the N-terminal and  
505 C-terminal residues, as well as the connecting loops were manually built and adjusted in Coot.  
506 The CHMP2A-CHMP3 heterodimer model was then expanded by helical symmetry in each  
507 direction in order to get 10 such dimers surrounding the central dimer. Thus, a total of 11 helical  
508 symmetry-related dimers were again checked in Coot, before applying the first round of real-space  
509 refinement in PHENIX (Adams et al., 2010) with non-crystallographic symmetry (NCS) restraints.  
510 NCS, along with SS (secondary structure) restraints were then used for a second round of real-  
511 space refinement. At last, the symmetry-related dimers were removed and the central CHMP2A-  
512 CHMP3 dimer was saved as the final model. The statistics of the final models were tabulated  
513 using MolProbity (Williams et al., 2018) and are summarized in **Table S1** and map versus atomic  
514 model FSC plots were computed in PHENIX (Afonine et al., 2018). All structure figures were  
515 generated with UCSF Chimera, ChimeraX (Goddard et al., 2018) and PyMOL (W. Delano; The  
516 PyMOL Molecular Graphics System, Version 1.8 Schrödinger, LLC, <http://www.pymol.org>).  
517 Sequence alignments were performed with Clustal Omega (Goujon et al., 2010) and ESPript  
518 (Robert and Gouet, 2014).

519  
520 **Data Availability**  
521 Cryo-EM maps and models were deposited to the PDB and EMDB with the following codes:  
522 membrane-bound CHMP2A-CHMP3, 430 Å diameter (PDB ID 7ZCG, EMD-14630) and  
523 membrane-bound CHMP2A-CHMP3, 410 Å diameter (PDB ID 7ZCH, EMD-14631).

524  
525 **Acknowledgement**  
526 This research was funded by the ANR (ANR-14-CE09-0003-01; ANR-19-CE11-0002-02)(W.W.).  
527 WW acknowledges support from the Institut Universitaire de France (IUF) and access to the  
528 platforms of the Grenoble Instruct-ERIC center (IBS and ISBG; UAR 3518 CNRS-CEA-UGA-  
529 EMBL) within the Grenoble Partnership for Structural Biology (PSB), with support from FRISBI  
530 (ANR-10-INBS-05-02) and GRAL, a project of the University Grenoble Alpes graduate school  
531 (Ecoles Universitaires de Recherche) CBH-EUR-GS (ANR-17-EURE-0003). The IBS electron  
532 microscope facility is supported by the Auvergne-Rhône-Alpes Region, the Fondation pour la  
533 Recherche Medicale (FRM), the FEDER/ERDF fund (European Regional Development Fund) and  
534 the GIS-IBiSA (Infrastructures en Biologie, Sante et Agronomie). We acknowledge the provision  
535 of in-house experimental time from the CM01 facility at the ESRF and we thank Leandro Estrozi  
536 for extensive discussion and help with helical image analysis.



537  
538 **Author contributions:** W.W. conceived the study, designed experiments, interpreted  
539 experiments, supervised and received funding for the study. K.A. performed all cryo-EM data  
540 analyses. N.D.F. established the membrane coating protocol. D.G. prepared wild type and mutant  
541 CHMP2A-CHMP3 polymers for all analyses. G.Su. (G. Sulbaran) performed negative staining EM  
542 analyses. C.B. and J.P.K. performed fluorescence microscopy imaging and H.W. mutant  
543 analyses. S.M. performed AFM analyses and W.H.R. supervised AFM analyses. G.E. and G.S.  
544 collected cryoEM data and A.D. supervised all aspects of cryoEM data analyses, structure solution  
545 and interpretation. W.W. wrote the paper with input from all authors.

546

547 **Competing interests:** The authors declare no competing interests.

548

## 549 **References**

- 550 Adams, P.D., Afonine, P.V., Bunkoczi, G., Chen, V.B., Davis, I.W., Echols, N., Headd, J.J., Hung,  
551 L.W., Kapral, G.J., Grosse-Kunstleve, R.W., *et al.* (2010). PHENIX: a comprehensive Python-  
552 based system for macromolecular structure solution. *Acta Crystallogr D Biol Crystallogr* 66, 213-  
553 221.
- 554 Adell, M.A., Vogel, G.F., Pakdel, M., Muller, M., Lindner, H., Hess, M.W., and Teis, D. (2014).  
555 Coordinated binding of Vps4 to ESCRT-III drives membrane neck constriction during MVB vesicle  
556 formation. *J Cell Biol* 205, 33-49.
- 557 Adell, M.A.Y., Migliano, S.M., Upadhyayula, S., Bykov, Y.S., Sprenger, S., Pakdel, M., Vogel, G.F.,  
558 Jih, G., Skillern, W., Behrouzi, R., *et al.* (2017). Recruitment dynamics of ESCRT-III and Vps4 to  
559 endosomes and implications for reverse membrane budding. *Elife* 6, e31652.
- 560 Afonine, P.V., Poon, B.K., Read, R.J., Sobolev, O.V., Terwilliger, T.C., Urzhumtsev, A., and  
561 Adams, P.D. (2018). Real-space refinement in PHENIX for cryo-EM and crystallography. *Acta*  
562 *Crystallogr D Struct Biol* 74, 531-544.
- 563 Allison, R., Lumb, J.H., Fassier, C., Connell, J.W., Ten Martin, D., Seaman, M.N., Hazan, J., and  
564 Reid, E. (2013). An ESCRT-spastin interaction promotes fission of recycling tubules from the  
565 endosome. *J Cell Biol* 202, 527-543.
- 566 Babst, M., Katzmann, D.J., Estepa-Sabal, E.J., Meerloo, T., and Emr, S.D. (2002). ESCRT-III: An  
567 endosome-associated heterooligomeric protein complex required for MVB sorting. *Dev Cell* 3,  
568 271-282.
- 569 Bajorek, M., Schubert, H.L., McCullough, J., Langelier, C., Eckert, D.M., Stubblefield, W.M., Uter,  
570 N.T., Myszka, D.G., Hill, C.P., and Sundquist, W.I. (2009). Structural basis for ESCRT-III protein  
571 autoinhibition. *Nat Struct Mol Biol* 16, 754-762.
- 572 Banjade, S., Shah, Y.H., Tang, S., and Emr, S.D. (2021). Design principles of the ESCRT-III  
573 Vps24-Vps2 module. *Elife* 10, e67709.
- 574 Banjade, S., Tang, S., Shah, Y.H., and Emr, S.D. (2019). Electrostatic lateral interactions drive  
575 ESCRT-III heteropolymer assembly. *Elife* 8, e46207.

- 576 Bertin, A., de Franceschi, N., de la Mora, E., Maity, S., Alqabandi, M., Miguët, N., di Cicco, A.,  
577 Roos, W.H., Mangenot, S., Weissenhorn, W., *et al.* (2020). Human ESCRT-III polymers assemble  
578 on positively curved membranes and induce helical membrane tube formation. *Nat Commun* **11**,  
579 2663.
- 580 Bodon, G., Chassefeyre, R., Pernet-Gallay, K., Martinelli, N., Effantin, G., Lutje Hulsik, D., Belly,  
581 A., Goldberg, Y., Chatellard-Causse, C., Blot, B., *et al.* (2011). Charged Multivesicular Body  
582 Protein 2B (CHMP2B) of the Endosomal Sorting Complex Required for Transport-III (ESCRT-III)  
583 Polymerizes into Helical Structures Deforming the Plasma Membrane. *Journal of Biological*  
584 *Chemistry* **286**, 40276-40286.
- 585 Buchkovich, N.J., Henne, W.M., Tang, S., and Emr, S.D. (2013). Essential N-terminal insertion  
586 motif anchors the ESCRT-III filament during MVB vesicle formation. *Dev Cell* **27**, 201-214.
- 587 Cada, A.K., Pavlin, M.R., Castillo, J.P., Tong, A.B., Larsen, K.P., Ren, X., Yokom, A., Tsai, F.-C.,  
588 Shiah, J., Bassereau, P.M., *et al.* (2022). Reconstitution reveals friction-driven membrane scission  
589 by the human ESCRT-III proteins CHMP1B and IST1. *bioRxiv* 2022.02.03.479062.
- 590 Caillat, C., Macheboeuf, P., Wu, Y., McCarthy, A.A., Boeri-Erba, E., Effantin, G., Gottlinger, H.G.,  
591 Weissenhorn, W., and Renesto, P. (2015). Asymmetric ring structure of Vps4 required for ESCRT-  
592 III disassembly. *Nat Commun* **6**, 8781.
- 593 Caillat, C., Maity, S., Miguët, N., Roos, W.H., and Weissenhorn, W. (2019). The role of VPS4 in  
594 ESCRT-III polymer remodeling. *Biochem Soc Trans* **47**, 441-448.
- 595 Cashikar, A.G., Shim, S., Roth, R., Maldazys, M.R., Heuser, J.E., and Hanson, P.I. (2014).  
596 Structure of cellular ESCRT-III spirals and their relationship to HIV budding. *Elife*, e02184.
- 597 Caspi, Y., and Dekker, C. (2018). Dividing the Archaeal Way: The Ancient Cdv Cell-Division  
598 Machinery. *Front Microbiol* **9**, 174.
- 599 Chiaruttini, N., Redondo-Morata, L., Colom, A., Humbert, F., Lenz, M., Scheuring, S., and Roux,  
600 A. (2015). Relaxation of Loaded ESCRT-III Spiral Springs Drives Membrane Deformation. *Cell*  
601 **163**, 866-879.
- 602 De Franceschi, N., Alqabandi, M., Miguët, N., Caillat, C., Mangenot, S., Weissenhorn, W., and  
603 Bassereau, P. (2018). The ESCRT protein CHMP2B acts as a diffusion barrier on reconstituted  
604 membrane necks. *J Cell Sci* **132**, jcs217968.
- 605 Desfosses, A., Ciuffa, R., Gutsche, I., and Sachse, C. (2014). SPRING - an image processing  
606 package for single-particle based helical reconstruction from electron cryomicrographs. *J Struct*  
607 *Biol* **185**, 15-26.
- 608 Dobro, M.J., Samson, R.Y., Yu, Z., McCullough, J., Ding, H.J., Chong, P.L., Bell, S.D., and Jensen,  
609 G.J. (2013). Electron cryotomography of ESCRT assemblies and dividing *Sulfolobus* cells  
610 suggests that spiraling filaments are involved in membrane scission. *Mol Biol Cell* **24**, 2319-2327.
- 611 Effantin, G., Dordor, A., Sandrin, V., Martinelli, N., Sundquist, W.I., Schoehn, G., and  
612 Weissenhorn, W. (2013). ESCRT-III CHMP2A and CHMP3 form variable helical polymers in vitro  
613 and act synergistically during HIV-1 budding. *Cell Microbiol* **15**, 213-226.
- 614 Emsley, P., Lohkamp, B., Scott, W.G., and Cowtan, K. (2010). Features and development of Coot.  
615 *Acta Crystallogr D Biol Crystallogr* **66**, 486-501.
- 616 Fabrikant, G., Lata, S., Riches, J.D., Briggs, J.A., Weissenhorn, W., and Kozlov, M.M. (2009).  
617 Computational model of membrane fission catalyzed by ESCRT-III. *PLoS Comput Biol* **5**,  
618 e1000575.

- 619 Goddard, T.D., Huang, C.C., Meng, E.C., Pettersen, E.F., Couch, G.S., Morris, J.H., and Ferrin,  
620 T.E. (2018). UCSF ChimeraX: Meeting modern challenges in visualization and analysis. *Protein*  
621 *Sci* 27, 14-25.
- 622 Goliand, I., Adar-Levor, S., Segal, I., Nachmias, D., Dadosh, T., Kozlov, M.M., and Elia, N. (2018).  
623 Resolving ESCRT-III Spirals at the Intercellular Bridge of Dividing Cells Using 3D STORM. *Cell*  
624 *Rep* 24, 1756-1764.
- 625 Goujon, M., McWilliam, H., Li, W., Valentin, F., Squizzato, S., Paern, J., and Lopez, R. (2010). A  
626 new bioinformatics analysis tools framework at EMBL-EBI. *Nucleic Acids Res* 38, W695-699.
- 627 Guizetti, J., Schermelleh, L., Mantler, J., Maar, S., Poser, I., Leonhardt, H., Muller-Reichert, T.,  
628 and Gerlich, D.W. (2011). Cortical Constriction During Abscission Involves Helices of ESCRT-III-  
629 Dependent Filaments. *Science* 331(6024), 1616-1620.
- 630 Gupta, T.K., Klumpe, S., Gries, K., Heinz, S., Wietrzynski, W., Ohnishi, N., Niemeyer, J., Spaniol,  
631 B., Schaffer, M., Rast, A., *et al.* (2021). Structural basis for VIPP1 oligomerization and  
632 maintenance of thylakoid membrane integrity. *Cell* 184, 3643-3659.
- 633 Hanson, P.I., Roth, R., Lin, Y., and Heuser, J.E. (2008). Plasma membrane deformation by circular  
634 arrays of ESCRT-III protein filaments. *J Cell Biol* 180(2), 389-402.
- 635 Harker-Kirschneck, L., Hafner, A.E., Yao, T., Vanhille-Campos, C., Jiang, X., Pulschen, A., Hurtig,  
636 F., Hryniuk, D., Culley, S., Henriques, R., *et al.* (2022). Physical mechanisms of ESCRT-III-driven  
637 cell division. *Proc Natl Acad Sci U S A* 119, e2107763119.
- 638 He, S., and Scheres, S.H.W. (2017). Helical reconstruction in RELION. *J Struct Biol* 198, 163-176.
- 639 Henne, W.M., Buchkovich, N.J., Zhao, Y., and Emr, S.D. (2012). The Endosomal Sorting Complex  
640 ESCRT-II Mediates the Assembly and Architecture of ESCRT-III Helices. *Cell* 151, 356-371.
- 641 Henne, W.M., Stenmark, H., and Emr, S.D. (2013). Molecular mechanisms of the membrane  
642 sculpting ESCRT pathway. *Cold Spring Harb Perspect Biol* 5, a016766.
- 643 Huber, S.T., Mostafavi, S., Mortensen, S.A., and Sachse, C. (2020). Structure and assembly of  
644 ESCRT-III helical Vps24 filaments. *Sci Adv* 6, eaba4897.
- 645 Im, Y.J., Wollert, T., Boura, E., and Hurley, J.H. (2009). Structure and function of the ESCRT-II-III  
646 interface in multivesicular body biogenesis. *Dev Cell* 17, 234-243.
- 647 Ithurbide, S., Gribaldo, S., Albers, S.V., and Pende, N. (2022). Spotlight on FtsZ-based cell  
648 division in Archaea. *Trends Microbiol*, S0966-0842X(0922)00005-00001.
- 649 Johnson, D.S., Bleck, M., and Simon, S.M. (2018). Timing of ESCRT-III protein recruitment and  
650 membrane scission during HIV-1 assembly. *Elife* 7, e36221.
- 651 Jouvenet, N., Bieniasz, P.D., and Simon, S.M. (2008). Imaging the biogenesis of individual HIV-1  
652 virions in live cells. *Nature* 454, 236-240.
- 653 Junglas, B., Huber, S.T., Heidler, T., Schlosser, L., Mann, D., Hennig, R., Clarke, M., Hellmann,  
654 N., Schneider, D., and Sachse, C. (2021). PspA adopts an ESCRT-III-like fold and remodels  
655 bacterial membranes. *Cell* 184, 3674-3688 e3618.
- 656 Kandiah, E., Giraud, T., de Maria Antolinos, A., Dobias, F., Effantin, G., Flot, D., Hons, M.,  
657 Schoehn, G., Susini, J., Svensson, O., *et al.* (2019). CM01: a facility for cryo-electron microscopy  
658 at the European Synchrotron. *Acta Crystallogr D Struct Biol* 75, 528-535.
- 659 Keya, J.J., Inoue, D., Suzuki, Y., Kozai, T., Ishikuro, D., Kodera, N., Uchihashi, T., Kabir, A.M.R.,  
660 Endo, M., Sada, K., *et al.* (2017). High-Resolution Imaging of a Single Gliding Protofilament of  
661 Tubulins by HS-AFM. *Sci Rep* 7, 6166.

- 662 Lata, S., Roessle, M., Solomons, J., Jamin, M., Gottlinger, H.G., Svergun, D.I., and Weissenhorn,  
663 W. (2008a). Structural basis for autoinhibition of ESCRT-III CHMP3. *J Mol Biol* 378, 818-827.
- 664 Lata, S., Schoehn, G., Jain, A., Pires, R., Piehler, J., Gottlinger, H.G., and Weissenhorn, W.  
665 (2008b). Helical structures of ESCRT-III are disassembled by VPS4. *Science* 321, 1354-1357.
- 666 Lee, I.H., Kai, H., Carlson, L.A., Groves, J.T., and Hurley, J.H. (2015). Negative membrane  
667 curvature catalyzes nucleation of endosomal sorting complex required for transport (ESCRT)-III  
668 assembly. *Proc Natl Acad Sci U S A* 112, 15892-15897.
- 669 Lin, Y., Kimpler, L.A., Naismith, T.V., Lauer, J.M., and Hanson, P.I. (2005). Interaction of the  
670 mammalian endosomal sorting complex required for transport (ESCRT) III protein hSnf7-1 with  
671 itself, membranes, and the AAA+ ATPase SKD1. *J Biol Chem* 280, 12799-12809.
- 672 Liu, J., Tassinari, M., Souza, D.P., Naskar, S., Noel, J.K., Bohuszewicz, O., Buck, M., Williams,  
673 T.A., Baum, B., and Low, H.H. (2021). Bacterial Vipp1 and PspA are members of the ancient  
674 ESCRT-III membrane-remodeling superfamily. *Cell* 184, 3660-3673.
- 675 Loncle, N., Agromayor, M., Martin-Serrano, J., and Williams, D.W. (2015). An ESCRT module is  
676 required for neuron pruning. *Sci Rep* 5, 8461.
- 677 Maity, S., Caillat, C., Miguet, N., Sulbaran, G., Effantin, G., Schoehn, G., Roos, W.H., and  
678 Weissenhorn, W. (2019). VPS4 triggers constriction and cleavage of ESCRT-III helical filaments.  
679 *Sci Adv* 5, eaau7198.
- 680 Maity, S., Ottele, J., Santiago, G.M., Frederix, P., Kroon, P., Markovitch, O., Stuart, M.C.A.,  
681 Marrink, S.J., Otto, S., and Roos, W.H. (2020). Caught in the Act: Mechanistic Insight into  
682 Supramolecular Polymerization-Driven Self-Replication from Real-Time Visualization. *J Am Chem*  
683 *Soc* 142, 13709-13717.
- 684 Maity, S., Trinco, G., Buzon, P., Anshari, Z.R., Kodera, N., Ngo, K.X., Ando, T., Slotboom, D.J.,  
685 and Roos, W.H. (2022). High-speed atomic force microscopy reveals a three-state elevator  
686 mechanism in the citrate transporter CitS. *Proc Natl Acad Sci U S A* 119, e2113927119.
- 687 Mast, F.D., Herricks, T., Strehler, K.M., Miller, L.R., Saleem, R.A., Rachubinski, R.A., and  
688 Aitchison, J.D. (2018). ESCRT-III is required for scissioning new peroxisomes from the  
689 endoplasmic reticulum. *J Cell Biol* 217, 2087-2102.
- 690 McCullough, J., Clippinger, A.K., Talledge, N., Skowyra, M.L., Saunders, M.G., Naismith, T.V.,  
691 Colf, L.A., Afonine, P., Arthur, C., Sundquist, W.I., *et al.* (2015). Structure and membrane  
692 remodeling activity of ESCRT-III helical polymers. *Science* 350, 1548-1551.
- 693 McCullough, J., Fisher, R.D., Whitby, F.G., Sundquist, W.I., and Hill, C.P. (2008). ALIX-CHMP4  
694 interactions in the human ESCRT pathway. *Proc Nat Acad Sci USA* 105, 7687-7691.
- 695 McCullough, J., Frost, A., and Sundquist, W.I. (2018). Structures, Functions, and Dynamics of  
696 ESCRT-III/Vps4 Membrane Remodeling and Fission Complexes. *Annu Rev Cell Dev Biol* 34, 85-  
697 109.
- 698 McMillan, B.J., Tibbe, C., Jeon, H., Drabek, A.A., Klein, T., and Blacklow, S.C. (2016). Electrostatic  
699 Interactions between Elongated Monomers Drive Filamentation of Drosophila Shrub, a Metazoan  
700 ESCRT-III Protein. *Cell Rep* 16, 1211-1217.
- 701 Mierzwa, B.E., Chiaruttini, N., Redondo-Morata, L., von Filseck, J.M., Konig, J., Larios, J., Poser,  
702 I., Muller-Reichert, T., Scheuring, S., Roux, A., *et al.* (2017). Dynamic subunit turnover in ESCRT-  
703 III assemblies is regulated by Vps4 to mediate membrane remodelling during cytokinesis. *Nat Cell*  
704 *Biol* 19, 787-798.

- 705 Moriscot, C., Gribaldo, S., Jault, J.M., Krupovic, M., Arnaud, J., Jamin, M., Schoehn, G., Forterre,  
706 P., Weissenhorn, W., and Renesto, P. (2011). Crenarchaeal CdvA forms double-helical filaments  
707 containing DNA and interacts with ESCRT-III-like CdvB. *PLoS ONE* 6, e21921.
- 708 Morita, E., Sandrin, V., McCullough, J., Katsuyama, A., Baci Hamilton, I., and Sundquist, W.I.  
709 (2011). ESCRT-III Protein Requirements for HIV-1 Budding. *Cell Host Microbe* 9, 235-242.
- 710 Moser von Filseck, J., Barberi, L., Talledge, N., Johnson, I.E., Frost, A., Lenz, M., and Roux, A.  
711 (2020). Anisotropic ESCRT-III architecture governs helical membrane tube formation. *Nat*  
712 *Commun* 11, 1516.
- 713 Muziol, T., Pineda-Molina, E., Ravelli, R.B., Zamborlini, A., Usami, Y., Gottlinger, H., and  
714 Weissenhorn, W. (2006). Structural basis for budding by the ESCRT-III factor CHMP3. *Dev Cell*  
715 10, 821-830.
- 716 Nguyen, H.C., Talledge, N., McCullough, J., Sharma, A., Moss, F.R., 3rd, Iwasa, J.H., Vershinin,  
717 M.D., Sundquist, W.I., and Frost, A. (2020). Membrane constriction and thinning by sequential  
718 ESCRT-III polymerization. *Nat Struct Mol Biol* 27, 392-399.
- 719 Olmos, Y., and Carlton, J.G. (2016). The ESCRT machinery: new roles at new holes. *Curr Opin*  
720 *Cell Biol* 38, 1-11.
- 721 Pettersen, E.F., Goddard, T.D., Huang, C.C., Couch, G.S., Greenblatt, D.M., Meng, E.C., and  
722 Ferrin, T.E. (2004). UCSF Chimera--a visualization system for exploratory research and analysis.  
723 *J Comput Chem* 25, 1605-1612.
- 724 Pfitzner, A.K., Mercier, V., Jiang, X., Moser von Filseck, J., Baum, B., Saric, A., and Roux, A.  
725 (2020). An ESCRT-III Polymerization Sequence Drives Membrane Deformation and Fission. *Cell*  
726 182, 1140-1155.
- 727 Pfitzner, A.K., Moser von Filseck, J., and Roux, A. (2021). Principles of membrane remodeling by  
728 dynamic ESCRT-III polymers. *Trends Cell Biol* 31, 856-868.
- 729 Pineda-Molina, E., Belrhali, H., Piefer, A.J., Akula, I., Bates, P., and Weissenhorn, W. (2006). The  
730 crystal structure of the C-terminal domain of Vps28 reveals a conserved surface required for  
731 Vps20 recruitment. *Traffic* 7, 1007-1016.
- 732 Pires, R., Hartlieb, B., Signor, L., Schoehn, G., Lata, S., Roessle, M., Moriscot, C., Popov, S.,  
733 Hinz, A., Jamin, M., *et al.* (2009). A crescent-shaped ALIX dimer targets ESCRT-III CHMP4  
734 filaments. *Structure* 17, 843-856.
- 735 Prescher, J., Baumgartel, V., Ivanchenko, S., Torrano, A.A., Brauchle, C., Muller, B., and Lamb,  
736 D.C. (2015). Super-resolution imaging of ESCRT-proteins at HIV-1 assembly sites. *PLoS Pathog*  
737 11, e1004677.
- 738 Remec Pavlin, M., and Hurley, J.H. (2020). The ESCRTs - converging on mechanism. *J Cell Sci*  
739 133, jcs240333.
- 740 Robert, X., and Gouet, P. (2014). Deciphering key features in protein structures with the new  
741 ENDscript server. *Nucleic Acids Res* 42, W320-324.
- 742 Rohou, A., and Grigorieff, N. (2015). CTFFIND4: Fast and accurate defocus estimation from  
743 electron micrographs. *J Struct Biol* 192, 216-221.
- 744 Rosenthal, P.B., and Henderson, R. (2003). Optimal determination of particle orientation, absolute  
745 hand, and contrast loss in single-particle electron cryomicroscopy. *J Mol Biol* 333, 721-745.

- 746 Sadoul, R., Laporte, M.H., Chassefeyre, R., Chi, K.I., Goldberg, Y., Chatellard, C., Hemming, F.J.,  
747 and Fraboulet, S. (2018). The role of ESCRT during development and functioning of the nervous  
748 system. *Semin Cell Dev Biol* 74, 40-49.
- 749 Saksena, S., Wahlman, J., Teis, D., Johnson, A.E., and Emr, S.D. (2009). Functional  
750 reconstitution of ESCRT-III assembly and disassembly. *Cell* 136, 97-109.
- 751 Scheres, S.H. (2012). RELION: implementation of a Bayesian approach to cryo-EM structure  
752 determination. *J Struct Biol* 180, 519-530.
- 753 Schoneberg, J., Pavlin, M.R., Yan, S., Righini, M., Lee, I.H., Carlson, L.A., Bahrami, A.H.,  
754 Goldman, D.H., Ren, X., Hummer, G., *et al.* (2018). ATP-dependent force generation and  
755 membrane scission by ESCRT-III and Vps4. *Science* 362, 1423-1428.
- 756 Scourfield, E.J., and Martin-Serrano, J. (2017). Growing functions of the ESCRT machinery in cell  
757 biology and viral replication. *Biochem Soc Trans* 45, 613-634.
- 758 Sherman, S., Kirchenbuechler, D., Nachmias, D., Tamir, A., Werner, S., Elbaum, M., and Elia, N.  
759 (2016). Resolving new ultrastructural features of cytokinetic abscission with soft-X-ray cryo-  
760 tomography. *Sci Rep* 6, 27629.
- 761 Shim, S., Kimpler, L.A., and Hanson, P.I. (2007). Structure/Function Analysis of Four Core  
762 ESCRT-III Proteins Reveals Common Regulatory Role for Extreme C-Terminal Domain. *Traffic* 8,  
763 1068-1079.
- 764 Tang, G., Peng, L., Baldwin, P.R., Mann, D.S., Jiang, W., Rees, I., and Ludtke, S.J. (2007).  
765 EMAN2: an extensible image processing suite for electron microscopy. *J Struct Biol* 157, 38-46.
- 766 Tang, S., Buchkovich, N.J., Henne, W.M., Banjade, S., Kim, Y.J., and Emr, S.D. (2016). ESCRT-  
767 III activation by parallel action of ESCRT-I/II and ESCRT-0/Bro1 during MVB biogenesis. *Elife* 5,  
768 e15507.
- 769 Tang, S., Henne, W.M., Borbat, P.P., Buchkovich, N.J., Freed, J.H., Mao, Y., Fromme, J.C., and  
770 Emr, S.D. (2015). Structural basis for activation, assembly and membrane binding of ESCRT-III  
771 Snf7 filaments. *Elife* 4, e12548.
- 772 Teis, D., Saksena, S., and Emr, S.D. (2008). Ordered Assembly of the ESCRT-III Complex on  
773 Endosomes Is Required to Sequester Cargo during MVB Formation. *Dev Cell* 15(4), 578-589.
- 774 Vietri, M., Radulovic, M., and Stenmark, H. (2020). The many functions of ESCRTs. *Nat Rev Mol*  
775 *Cell Biol* 21, 25-42.
- 776 Votteler, J., and Sundquist, W.I. (2013). Virus budding and the ESCRT pathway. *Cell Host Microbe*  
777 14, 232-241.
- 778 Waterhouse, A., Bertoni, M., Bienert, S., Studer, G., Tauriello, G., Gumienny, R., Heer, F.T., de  
779 Beer, T.A.P., Rempfer, C., Bordoli, L., *et al.* (2018). SWISS-MODEL: homology modelling of  
780 protein structures and complexes. *Nucleic Acids Res* 46, W296-W303.
- 781 Whitley, P., Reeves, B.J., Hashimoto, M., Riley, A.M., Potter, B.V.L., and Holman, G.D. (2003).  
782 Identification of Mammalian Vps24p as an Effector of Phosphatidylinositol 3,5-Bisphosphate-  
783 dependent Endosome Compartmentalization. *J Biol Chem* 278, 38786-38795.
- 784 Williams, C.J., Headd, J.J., Moriarty, N.W., Prisant, M.G., Videau, L.L., Deis, L.N., Verma, V.,  
785 Keedy, D.A., Hintze, B.J., Chen, V.B., *et al.* (2018). MolProbity: More and better reference data  
786 for improved all-atom structure validation. *Protein Sci* 27, 293-315.

- 787 Xiao, J., Chen, X.W., Davies, B.A., Saltiel, A.R., Katzmann, D.J., and Xu, Z. (2009). Structural  
788 basis of Ist1 function and Ist1-Did2 interaction in the multivesicular body pathway and cytokinesis.  
789 *Mol Biol Cell* *20*, 3514-3524.
- 790 Zamborlini, A., Usami, Y., Radoshitzky, S.R., Popova, E., Palu, G., and Gottlinger, H. (2006).  
791 Release of autoinhibition converts ESCRT-III components into potent inhibitors of HIV-1 budding.  
792 *Proc Natl Acad Sci U S A* *103*, 19140-19145.
- 793 Zhen, Y., Radulovic, M., Vietri, M., and Stenmark, H. (2021). Sealing holes in cellular membranes.  
794 *EMBO J* *40*, e106922.
- 795 Zheng, S.Q., Palovcak, E., Armache, J.P., Verba, K.A., Cheng, Y., and Agard, D.A. (2017).  
796 MotionCor2: anisotropic correction of beam-induced motion for improved cryo-electron  
797 microscopy. *Nat Methods* *14*, 331-332.
- 798 Zivanov, J., Nakane, T., Forsberg, B.O., Kimanius, D., Hagen, W.J., Lindahl, E., and Scheres,  
799 S.H. (2018). New tools for automated high-resolution cryo-EM structure determination in RELION-  
800 3. *Elife* *7*, e42166.
- 801
- 802

803 **Figures**

804

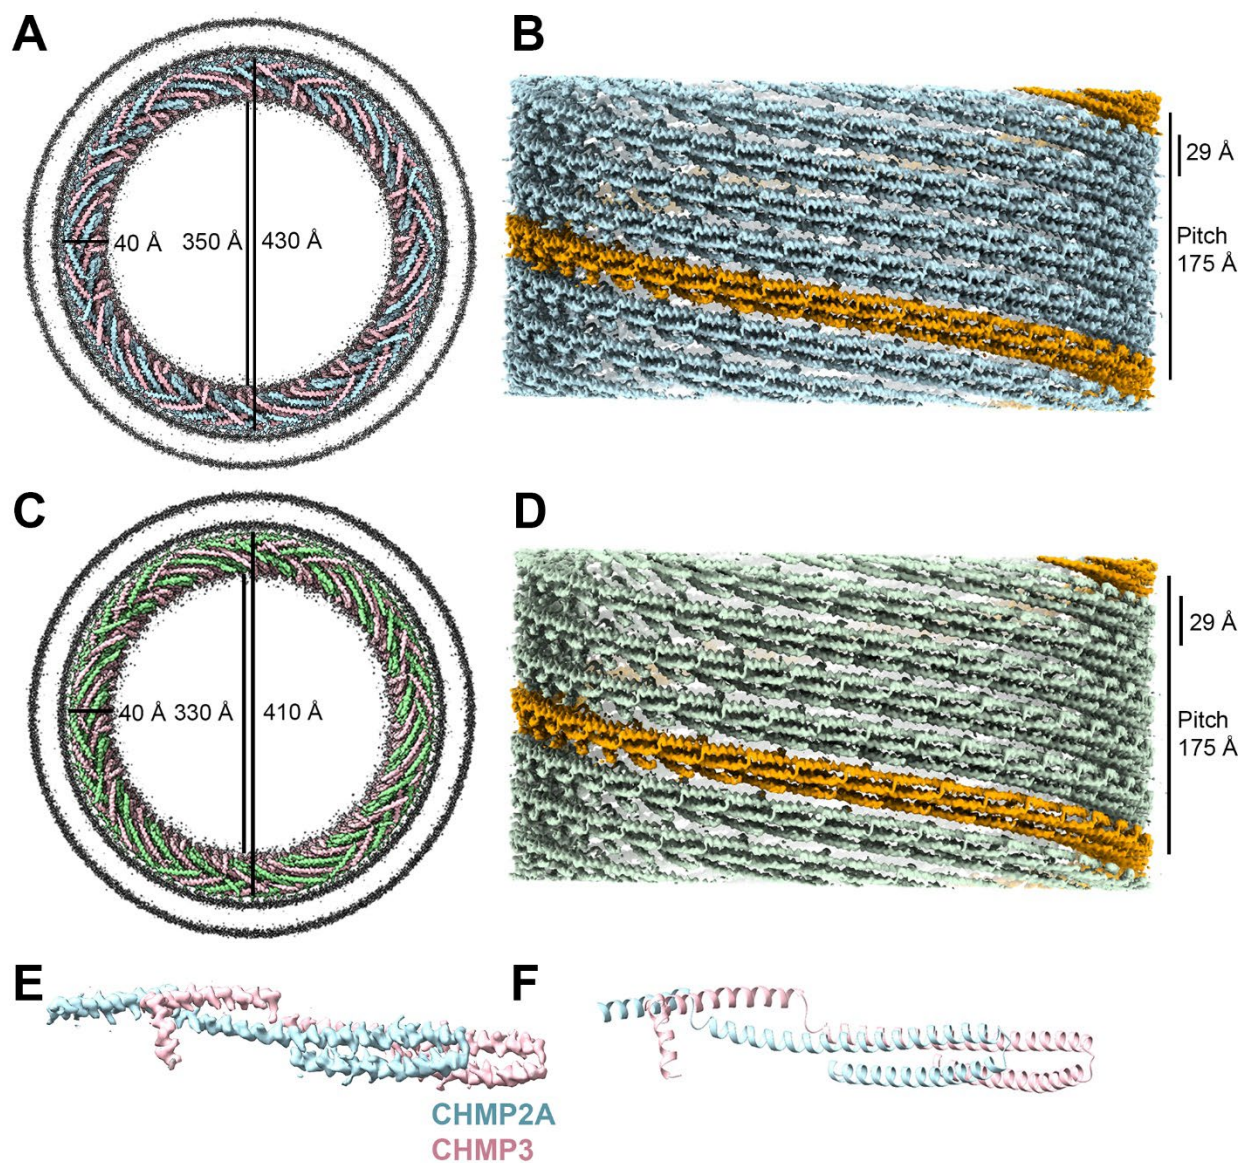

805

806

807 **Figure 1: Cryo-EM structure of CHMP2A-CHMP3 membrane-coated helical polymers**

808 **(A)** Density map of the reconstructed 430 Å diameter CHMP2A-CHMP3 membrane tube with the  
809 top view looking down the helical axis. The helical arrangement of CHMP2A (light blue) and  
810 CHMP3 (pink) inside the bilayer membrane (dark grey) is shown. The thickness, and the inner  
811 and outer diameter of the helical protein tube are also marked in Å.

812 **(B)** Side view of the helical polymer without the lipid membrane. One left-handed filament is  
813 indicated in orange, and the thickness of one filament and the pitch of the helical assembly are  
814 also marked.



815 **(C)** Density map of the reconstructed 410 Å diameter CHMP2A-CHMP3 membrane tube with the  
816 top view looking down the helical axis. The helical arrangement of CHMP2A (green) and CHMP3  
817 (pink) inside the bilayer membrane (dark grey) is shown. The thickness, and the inner and outer  
818 diameter of the helical protein tube are indicated in Å.

819 **(D)** Side view of the helical polymer without the lipid membrane. One left-handed filament is  
820 indicated in orange, and the thickness of one filament and the pitch of the helical assembly are  
821 indicated.

822 **(E)** Cryo-EM density of the single repeating unit of the 430 Å diameter polymer formed by the  
823 heterodimer of CHMP2A (light blue) and CHMP3 (pink) is indicated.

824 **(F)** Ribbon representation of the atomic model of CHMP2A (light blue) - CHMP3 (pink)  
825 heterodimer.

826

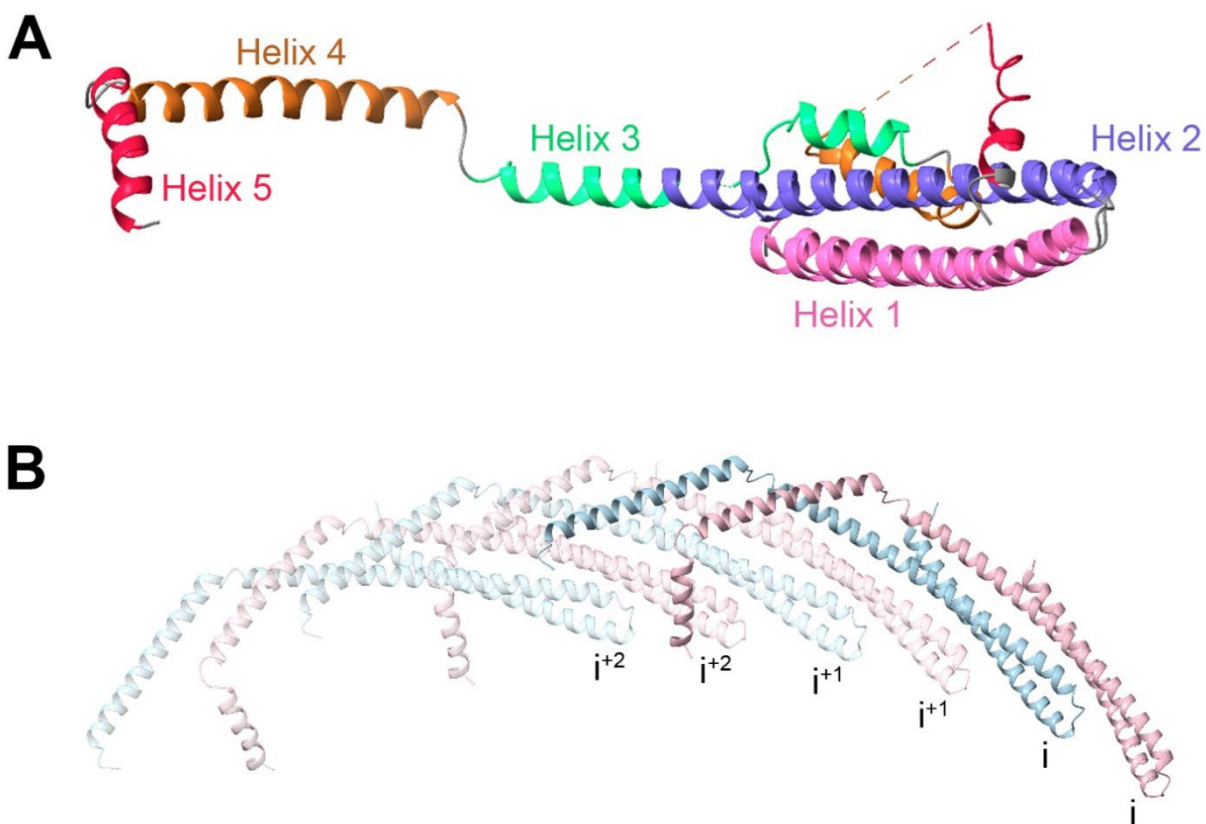

827  
828 **Figure 2: Atomic model and architecture of the CHMP2A-CHMP3 helical polymer.**  
829 **(A)** Ribbon diagram of C $\alpha$  superposition of the closed and open CHMP3 conformations (Helix 1:  
830 pink, Helix 2: purple, Helix 3: light green, Helix 4: brown, Helix 5: red).  
831 **(B)** Three interlocked copies of CHMP2A-CHMP3 heterodimer are shown as ribbons. Helix 4 and  
832 5 of CHMP3 (pink) interact with four subsequent protomers. Helix 4 of CHMP2A (light blue) also  
833 makes similar interactions.  
834  
835

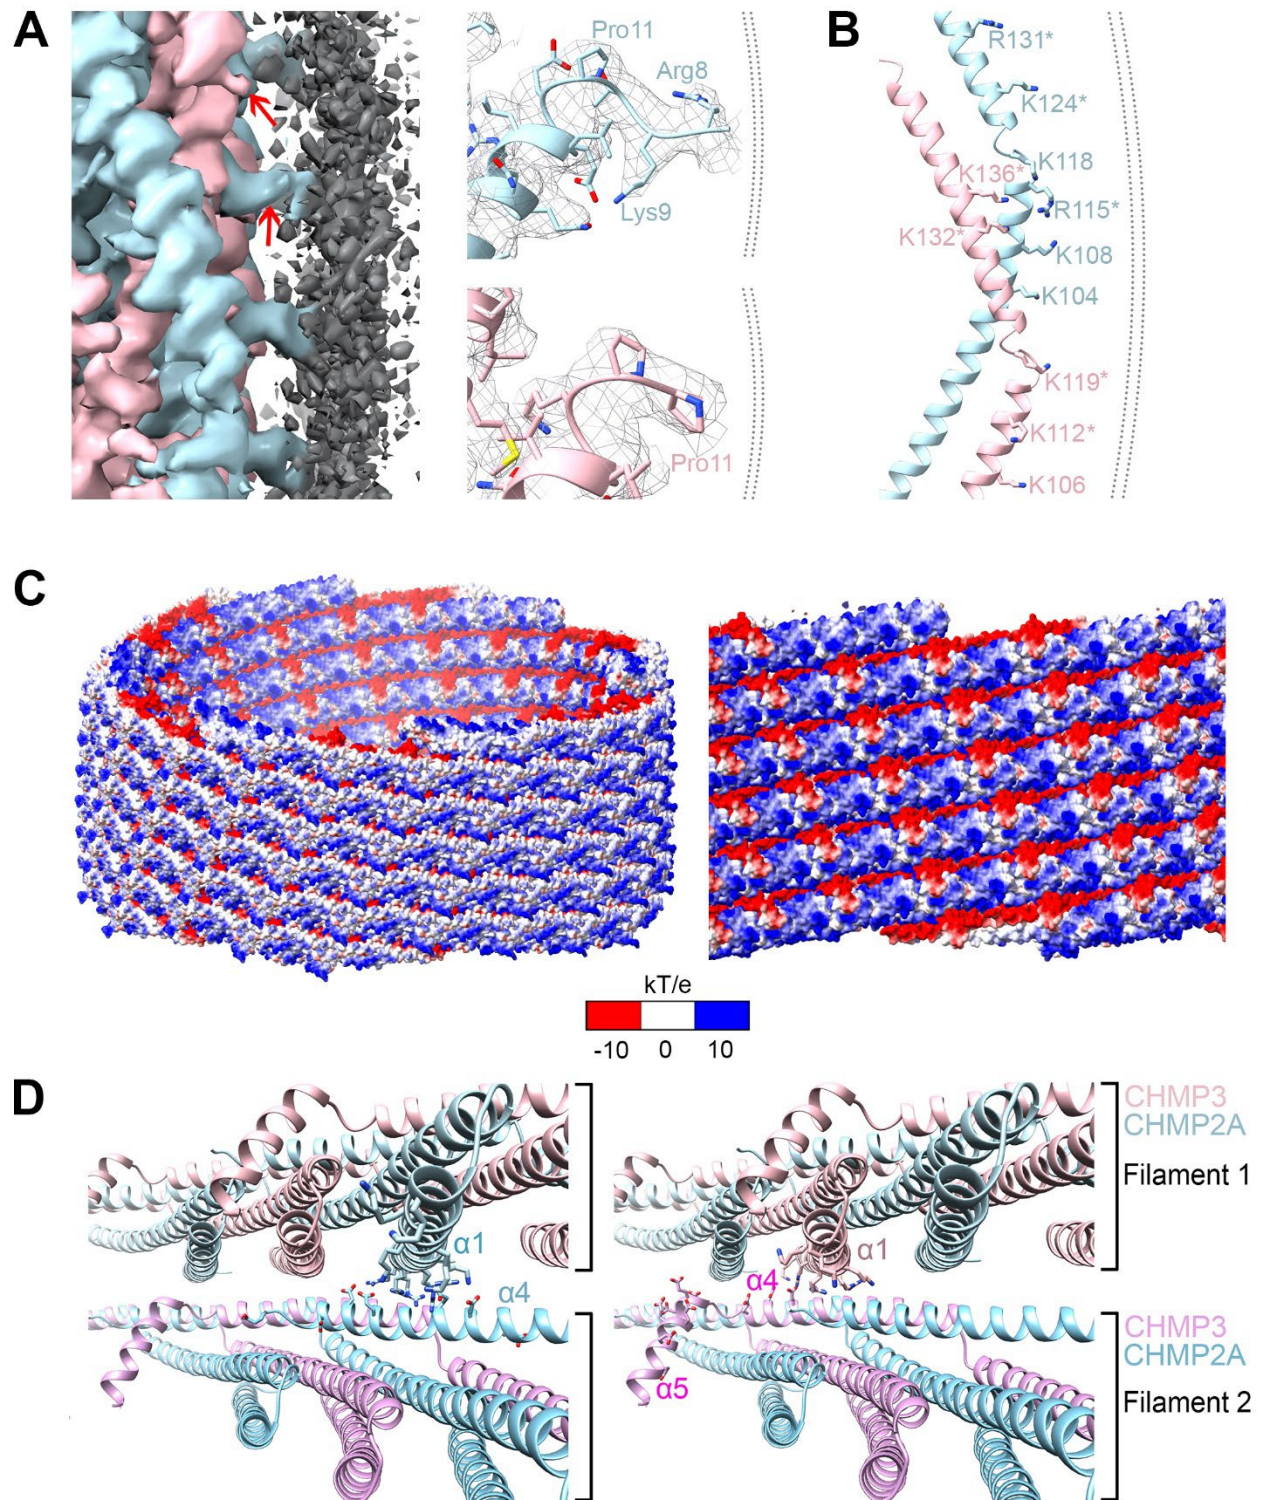

836

837

838 **Figure 3: Membrane interaction of the CHMP2A-CHMP3 filament.**

839 **(A)** Left panel, zoomed-in view of the membrane-bound CHMP2A-CHMP3 filament, highlighting  
840 the interface between lipid membrane (dark grey) and CHMP2A (light blue) and CHMP3 (pink).  
841 Red arrows are pointing to the N-termini of both CHMP2A and CHMP3 that are oriented towards  
842 the lipid bilayer. Right panel, the orientation of the N-termini is determined by Pro11 of CHMP2A  
843 (light blue) and CHMP3 (pink) shown with the density map.

844 **(B)** Ribbon diagram of the CHMP2A-CHMP3 heterodimer indicating the basic residues (sticks)  
845 oriented towards the membrane. Basic residues conserved in yeast Vps2 and Vps24 are marked  
846 by asterisks.

847 **(C)** Electrostatic potential map of the CHMP2A-CHMP3 filament (left panel, tilted, side view),  
848 revealing the exposure of the cluster of basic charges, a small negatively charged surface and a  
849 neutral surface to the membrane. Right panel, zoomed-in view of the electrostatic surface of the  
850 inside of the polymer showing clusters of negative charges in one filament juxtaposed to positive  
851 charges of the neighboring filament.

852 **(D)** Close-up of the inter-filament interactions. Ribbon diagram of two neighboring filaments  
853 showing the basic and acidic residues of CHMP2A (left panel) and CHMP3 (right panel) implicated  
854 in electrostatic inter-filament interactions.

855

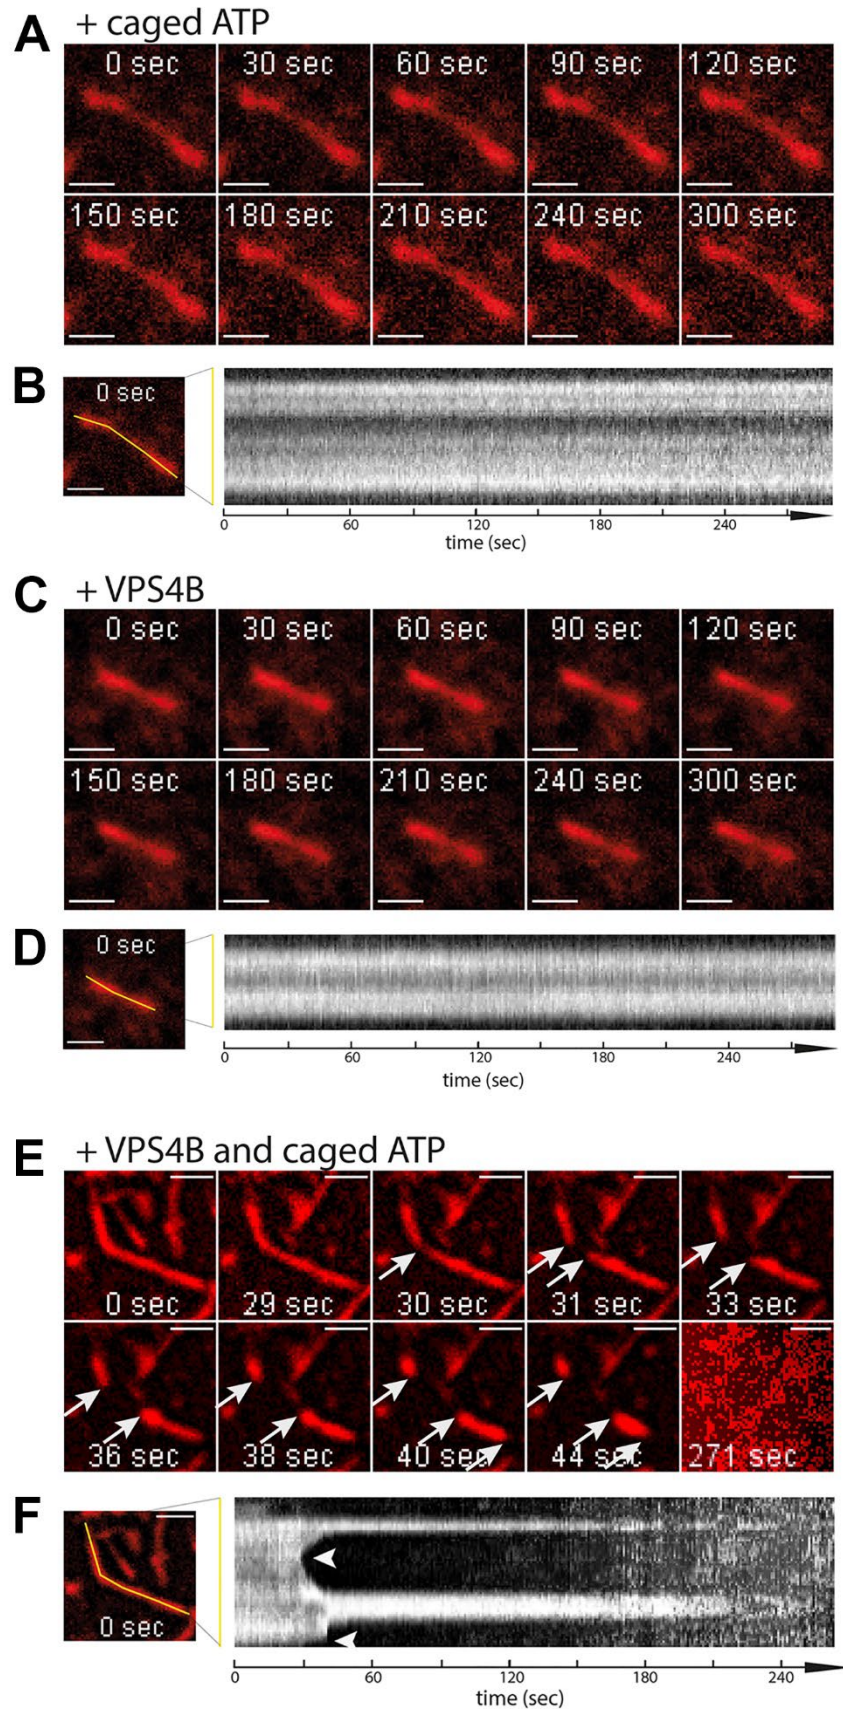

857 **Figure 4: Imaging of VPS4B and ATP induced cleavage of CHMP2A-CHMP3 membrane**  
858 **coated tubes.**

859 **(A)** A CHMP2A-CHMP3-caged ATP containing membrane coated tube was activated at 365 nm  
860 (10%, 10s) to uncage ATP and imaged over 300s (movie S1). Scale bar, 1 $\mu$ m.

861 **(B)** The kymograph of the tube shows that the tube stays intact over the imaging time.

862 **(C)** A CHMP2A-CHMP3-VPS4B containing membrane coated tube was activated at 365 nm (10%,  
863 10s) to uncage ATP and imaged over 300s. Scale bar, 1 $\mu$ m.

864 **(D)** The kymograph of the tube shows that the tube stays intact over the imaging time. **(A)** to **(D)**  
865 demonstrate that imaging at 550 nm to visualize the membrane tube and ATP uncaging at 365  
866 nm did not change the tube structures (movie S2).

867 **(E)** Imaging of a CHMP2A-CHMP3-VPS4B-caged ATP containing membrane-coated tubes  
868 following ATP uncaging (365 nm, 10%, 10s) reveals constriction and cleavage of the tube at 30  
869 s followed by a shrinking event from both sides. Another shrinking event is observed at 40s.  
870 Eventually all tubes were fully disassembled 271 s (movie S3 and S4). Scale bar, 1 $\mu$ m.

871 **(F)** The kymograph of the tube indicates the kinetics of cleavage and shrinking.

872

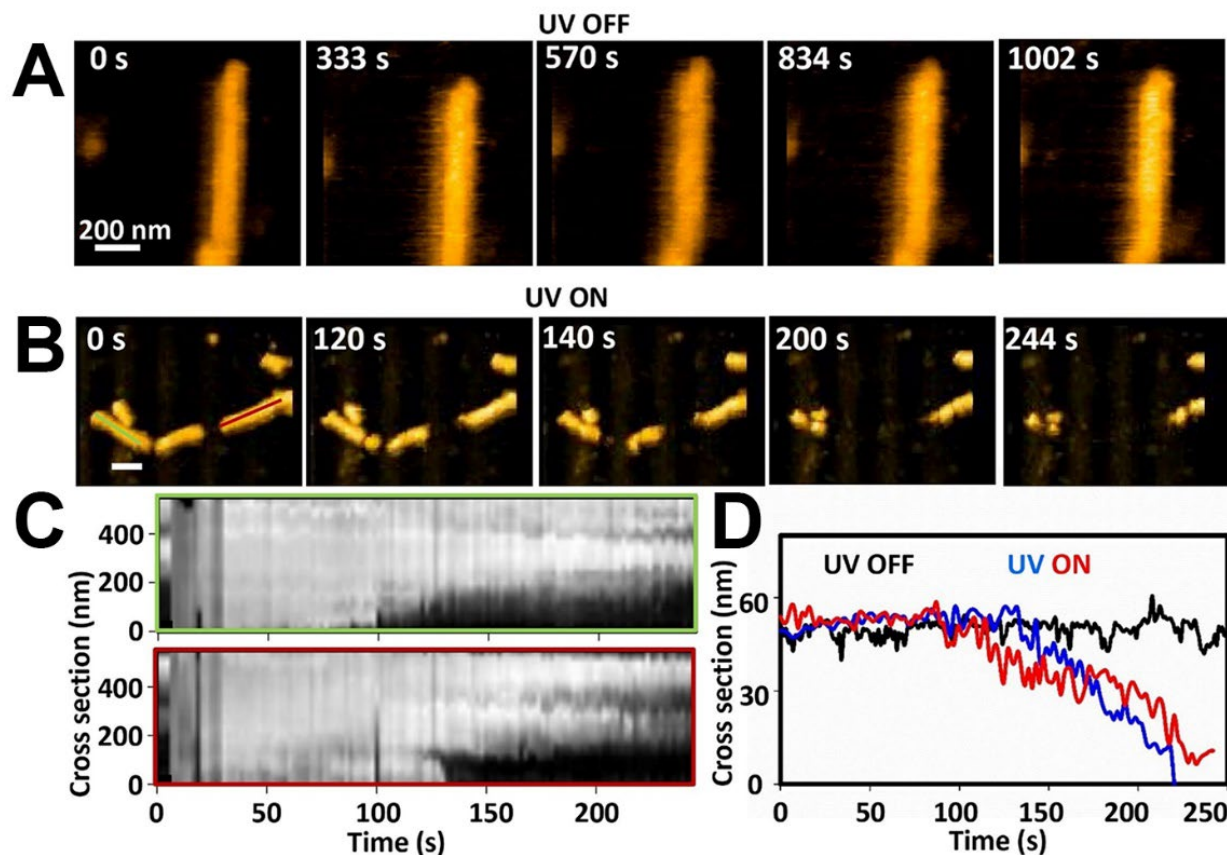

873  
874  
875 **Figure 5. Constriction, cleavage, and disassembly of membrane coated CHMP2A-CHMP3**  
876 **tube.**  
877 **(A)** Snapshots of HS-AFM images of CHMP2A-CHMP3 tubes coated with membrane and loaded  
878 with 5  $\mu$ M VPS4B, 10 mM caged ATP, in absence of UV irradiation. Scale bar, 200 nm.  
879 **(B)** As in A, but upon 365 nm UV irradiation. Scale bar, 200 nm.  
880 **(C)** Kymograph representation of the height vs time along the two lines in panel B (leftmost image)  
881 throughout the movie S10.  
882 **(D)** Example of height vs time profile of the membrane coated tube in absence of UV irradiation  
883 (in black), and in presence of UV irradiation (in blue and red).  
884

## Supplemental Figures

885  
886

### 887 **Structural basis of CHMP2A-CHMP3 ESCRT-III polymer assembly and membrane** 888 **cleavage**

889  
890 Kimi Azad<sup>1</sup>, Delphine Guilligay<sup>1</sup>, Cecile Boscheron<sup>1\*</sup>, Sourav Maity<sup>2\*</sup>, Nicola De Franceschi<sup>1,3\*</sup>,  
891 Guidenn Sulbaran<sup>1</sup>, Gregory Effantin<sup>1</sup>, Haiyan Wang<sup>1</sup>, Jean-Philippe Kleman<sup>1</sup>, Patricia  
892 Bassereau<sup>3</sup>, Guy Schoehn<sup>1</sup>, Wouter H Roos<sup>2</sup>, Ambroise Desfosses<sup>1\*</sup>, Winfried Weissenhorn<sup>1\*</sup>

893  
894

895 <sup>1</sup> Univ. Grenoble Alpes, CEA, CNRS, Institut de Biologie Structurale (IBS), Grenoble, France.  
896 <sup>2</sup> Moleculaire Biofysica, Zernike Instituut, Rijksuniversiteit Groningen, Groningen, Netherlands.  
897 <sup>3</sup> Institut Curie, Université PSL, Sorbonne Université, CNRS, Laboratoire Physico Chimie Curie,  
898 Paris, France.

899



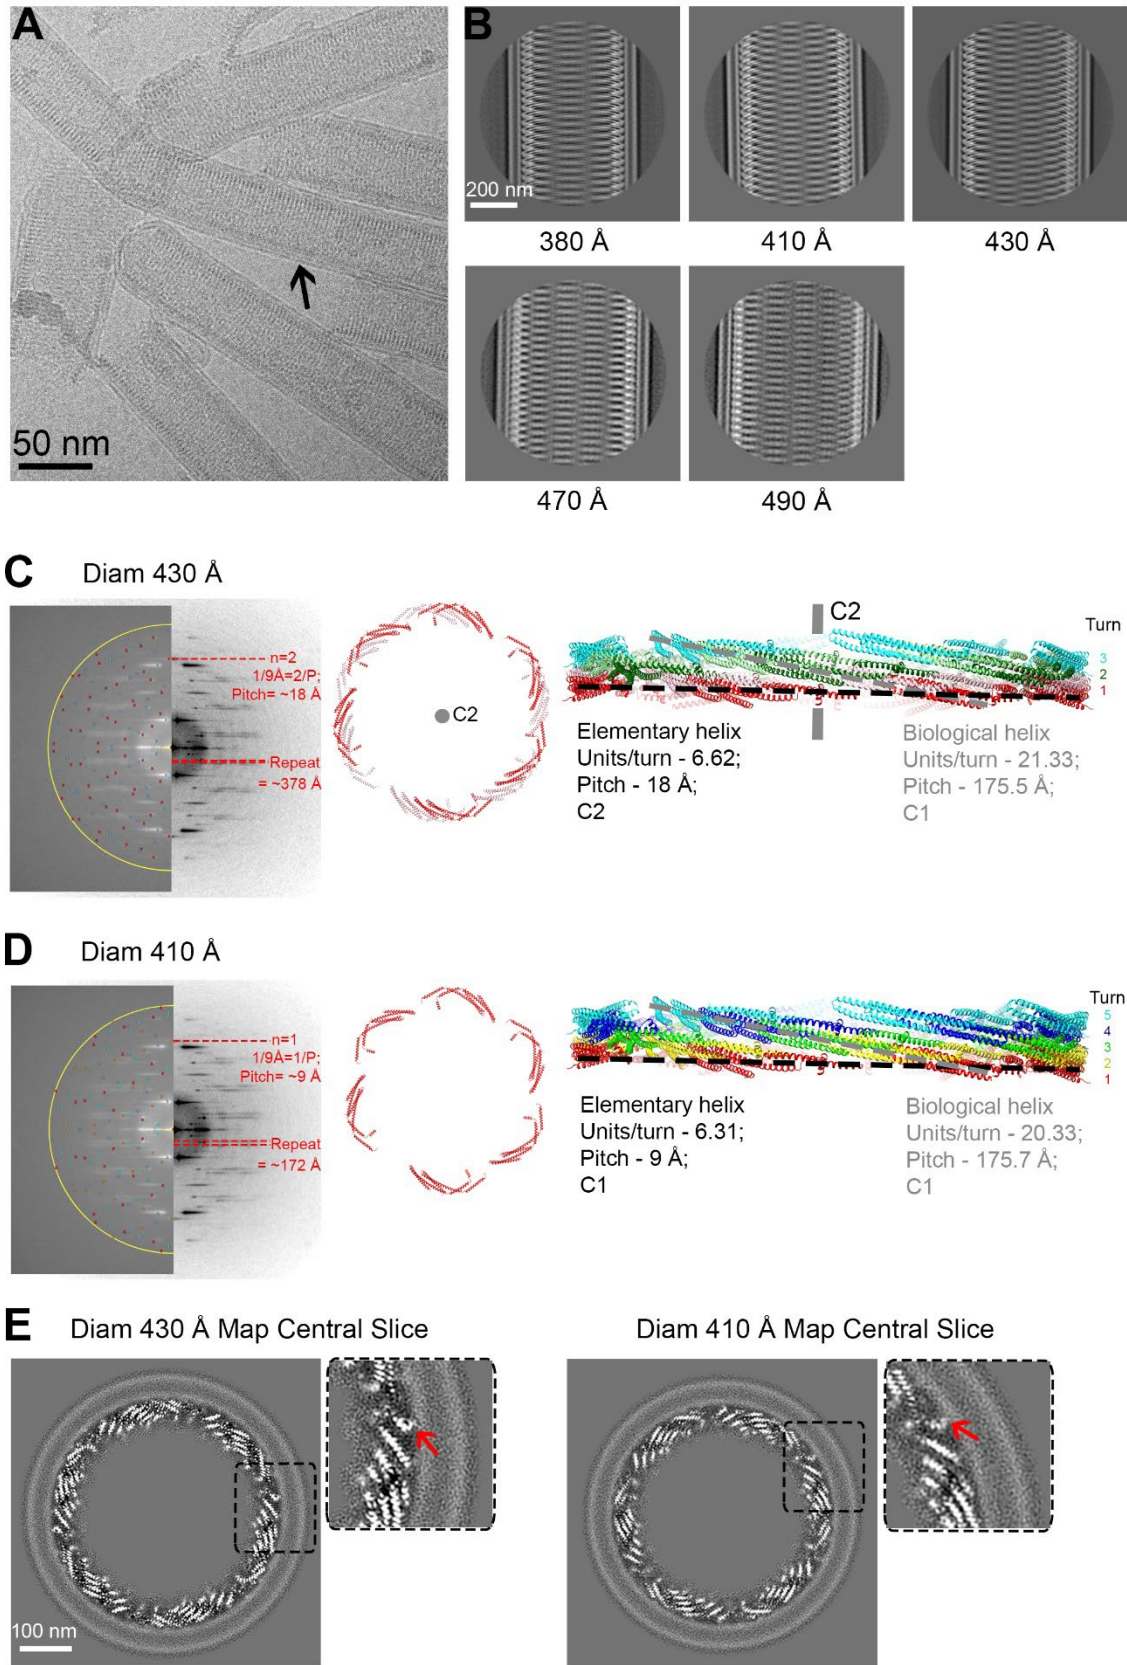

901 **Figure S1: Cryo-EM data processing of CHMP2A-CHMP3 membrane-coated tubes and**  
902 **helical symmetry analyses**  
903 **(A)** Representative cryo-electron micrograph of CHMP2A-CHMP3 membrane tubes, with an arrow  
904 pointing to the lipid bilayer. Scale bar, 50 nm.  
905 **(B)** Selected 2D class averages of manually picked datasets, arranged according to the tube  
906 diameter ranging from 380 to 490 Å as indicated.  
907 **(C), (D)** Helical symmetry determination and representation of the elementary and biological  
908 helices for the 430 Å and 410 Å diameter tubes. Left panel, the sum of the 2D power spectra of  
909 segments corresponding to one class-average show in both cases a maximum on or near the  
910 meridian corresponding to the pitch (Bessel order  $n=1$  for C1 helix;  $n=2$  for C2 helix) instead of  
911 the axial rise, due to the large helical diameter and possible inclusion of slightly out-of-plane tilted  
912 segments in the class-average. The left half of the sum of the power spectra show the calculated  
913 position from helixplorer of the two first maxima of each Bessel function corresponding to the  
914 determined symmetry. Middle panel, six asymmetric units (CHMP2A-CHMP3 dimers; in red) of  
915 the elementary helix are represented. The symmetry related protomers of the 430 Å diameter are  
916 colored in light red.  
917 **(C), (D)** Right panel, side view of the elementary helix with turns (red, yellow, green, blue and  
918 aqua) indicated with a black dashed line. The grey dashed line follows one turn of the biological  
919 helix. The central grey line (in C) highlights the C2 symmetry axis. Symmetry parameters of both  
920 the elementary and biological helices are indicated.  
921 **(E)** Central slices looking down the helical axis of the cryo-EM 3D reconstructions of the 430 and  
922 410 Å diameter tubes. The red arrows in the right zoom-in images indicate the density of the N-  
923 terminal region prone to insert into the lipid bilayer.  
924

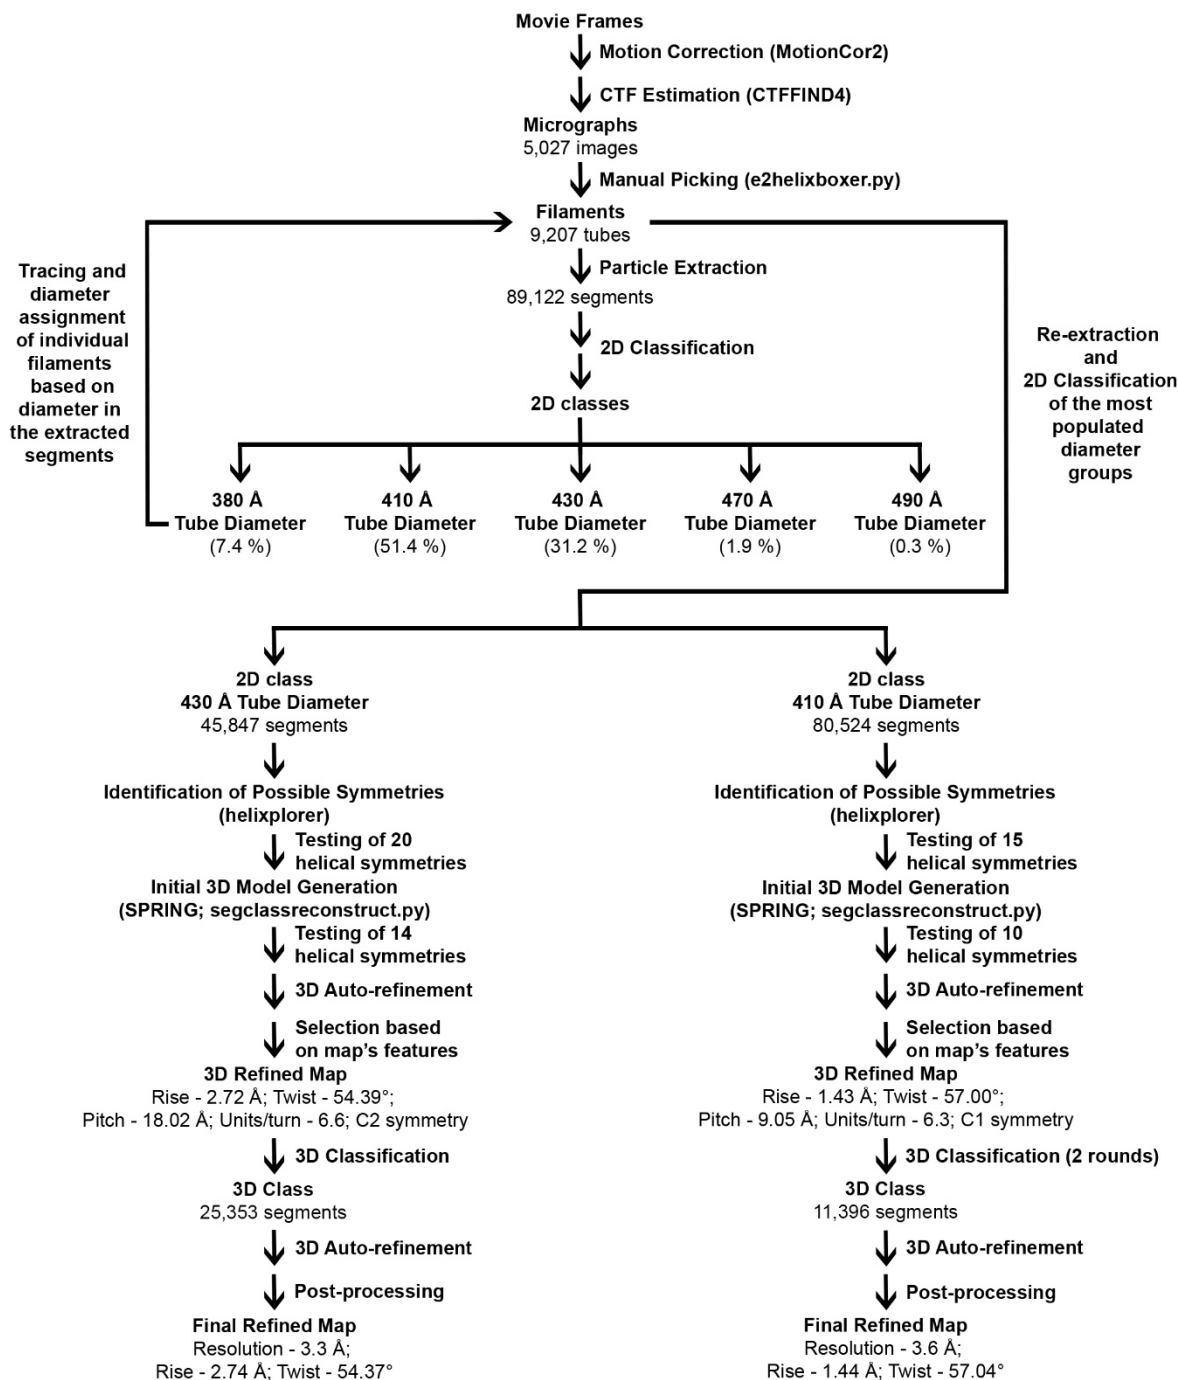

925

926

927

928

929

930

931

932

933

934

## Figure S2: Cryo-EM image processing workflow of 430 and 410 Å diameter tubes structure determination.

Basic image processing strategy used for helical 3D reconstruction and refinement of 430 and 410 Å diameter tubes is shown. Helical filaments were segmented and classified based on the tube diameter. Segment subsets were subjected to symmetry determination (<http://rico.ibs.fr/helixplorer/>) and initial 3D model generation in SPRING, followed by symmetry refinement and final 3D structure refinement in RELION. A complete description of the processing workflow is provided in 'Materials and Methods' section.

935

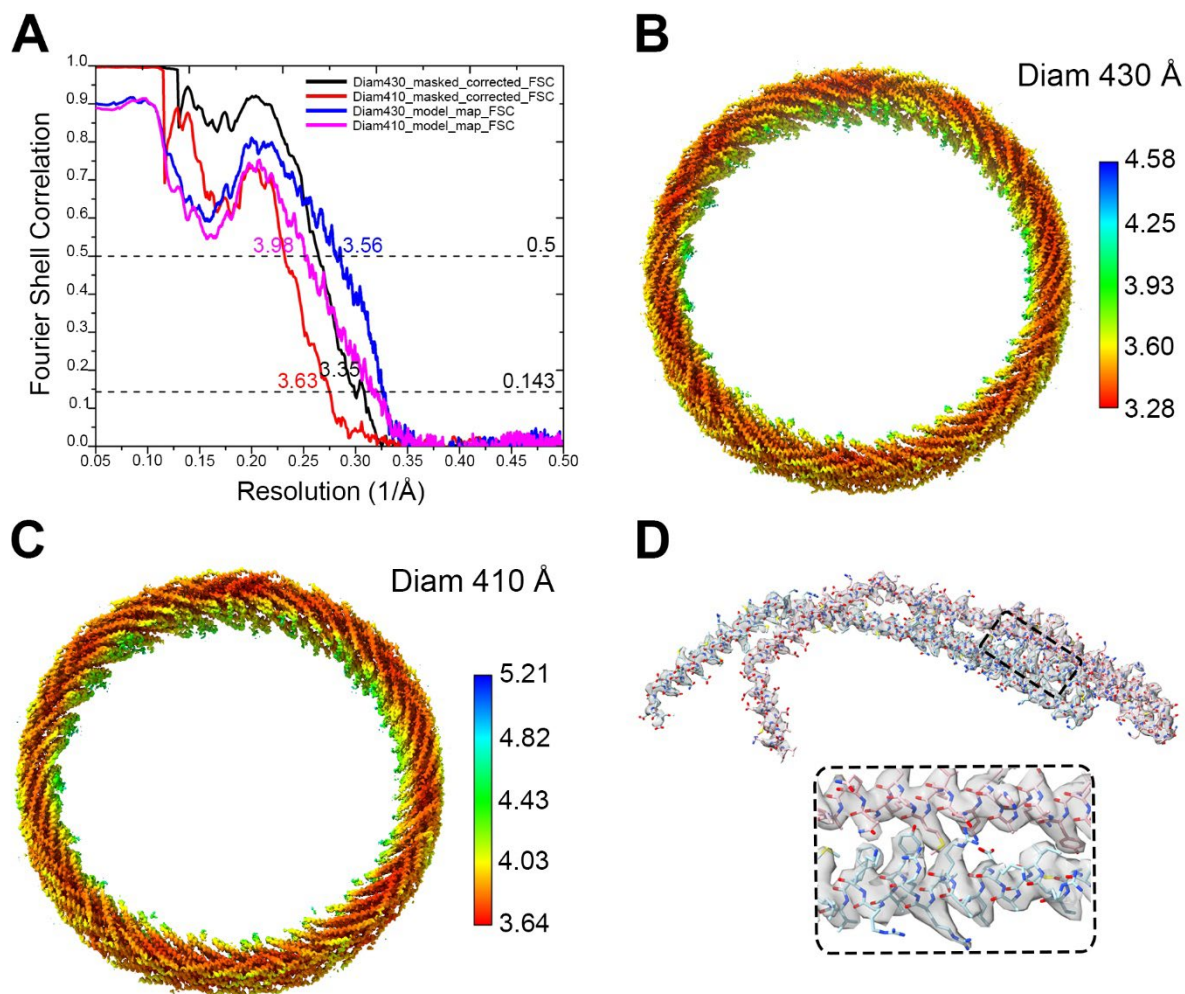

936

937 **Figure S3: 430 and 410 Å diameter tubes FSC curves, local resolution maps and atomic**  
938 **model fitting.**

939 **(A)** FSC curves for the 430 Å (black) and 410 Å (red) diameter tube maps, with the resolutions at  
940 the FSC cut-off of 0.143 are indicated. Model versus map FSC curves, with the resolutions at the  
941 FSC cut-off of 0.5 are indicated for the 430 Å (blue) and 410 Å (pink) diameter tube maps.

942 Local resolution estimates are mapped onto the 430 Å **(B)**, and 410 Å **(C)** diameter tube cryo-EM  
943 density maps and the color keys (right) highlight the local resolution values in Å.

944 **(D)** The refined atomic model of CHMP2A-CHMP3 dimer was fit into the corresponding cryo-EM  
945 density map of the 430 Å diameter tube. The inset (below) represents the zoomed-in view of the  
946 fitted model, indicating CHMP2A and CHMP3 helices and the corresponding map.

947

948

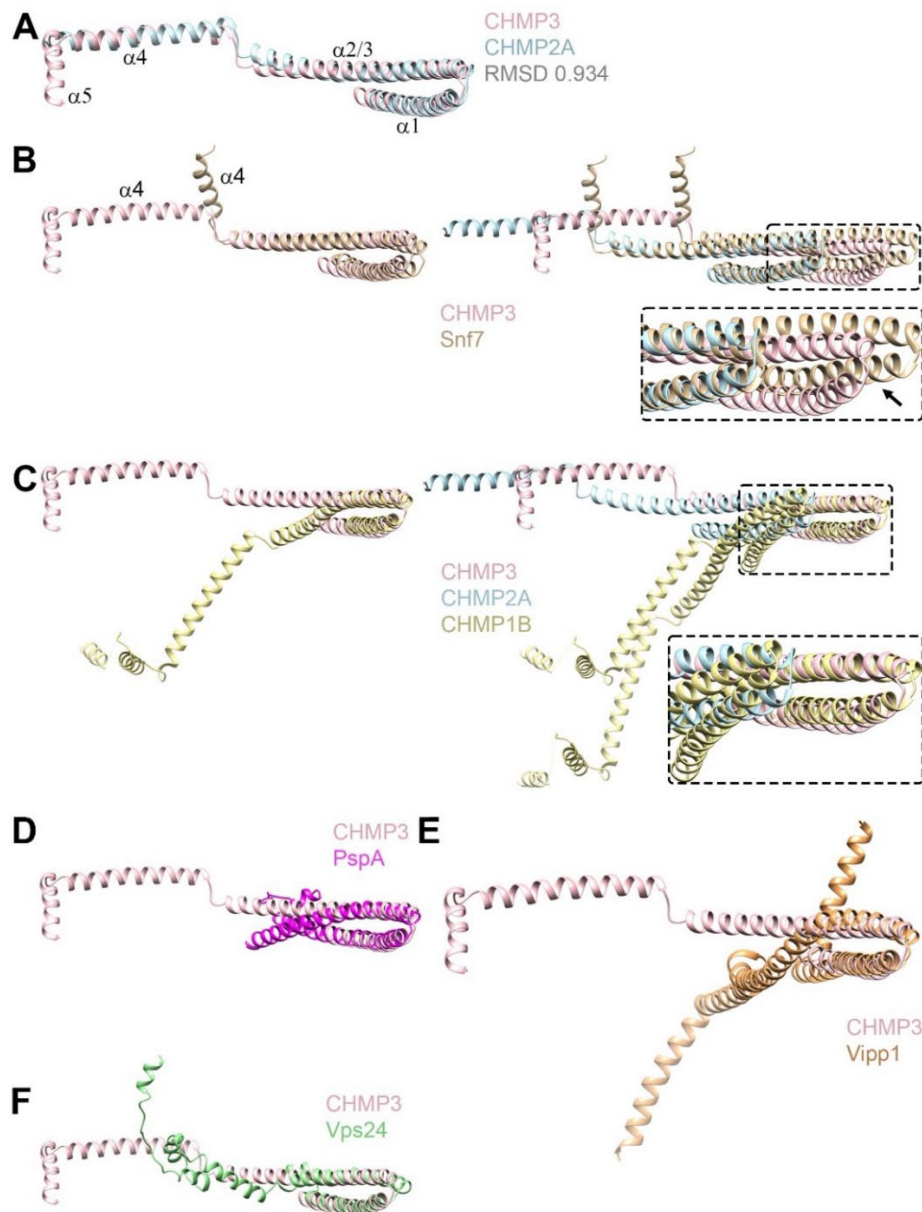

949  
950 **Figure S4: Comparison of ESCRT-III open conformations highlights their versatile**  
951 **polymerization modes**  
952 **(A)** Ribbon diagram of C $\alpha$  superposition of CHMP2A and CHMP3 reveals an RMSD of 0.934 Å.  
953 **(B)** Ribbon diagram of C $\alpha$  superposition of CHMP3 with an Snf7 monomer (left panel) and with  
954 the homodimer (crystallographic dimer) (right panel), which indicates different hairpin interaction  
955 (arrow) for the second protomer and different orientations of Snf7 helix 4.  
956 **(C)** Ribbon diagram of C $\alpha$  superposition of CHMP3 and CHMP1B (left panel) and the  
957 superposition of the CHMP2A-CHMP3 heterodimer onto the CHMP1B homodimer (right panel)  
958 indicate the differences in helical hairpin stacking (zoom, right panel) and orientations of the C-  
959 terminal helical arms (helices 3 to 5).  
960 **(D)** Ribbon diagram of C $\alpha$  superposition of CHMP3 (pink) with PspA and **(E)** with Vipp1.  
961 **(F)** Ribbon diagram of C $\alpha$  superposition of CHMP3 with an intermediate Vps24 conformation that  
962 forms filaments on its own.  
963

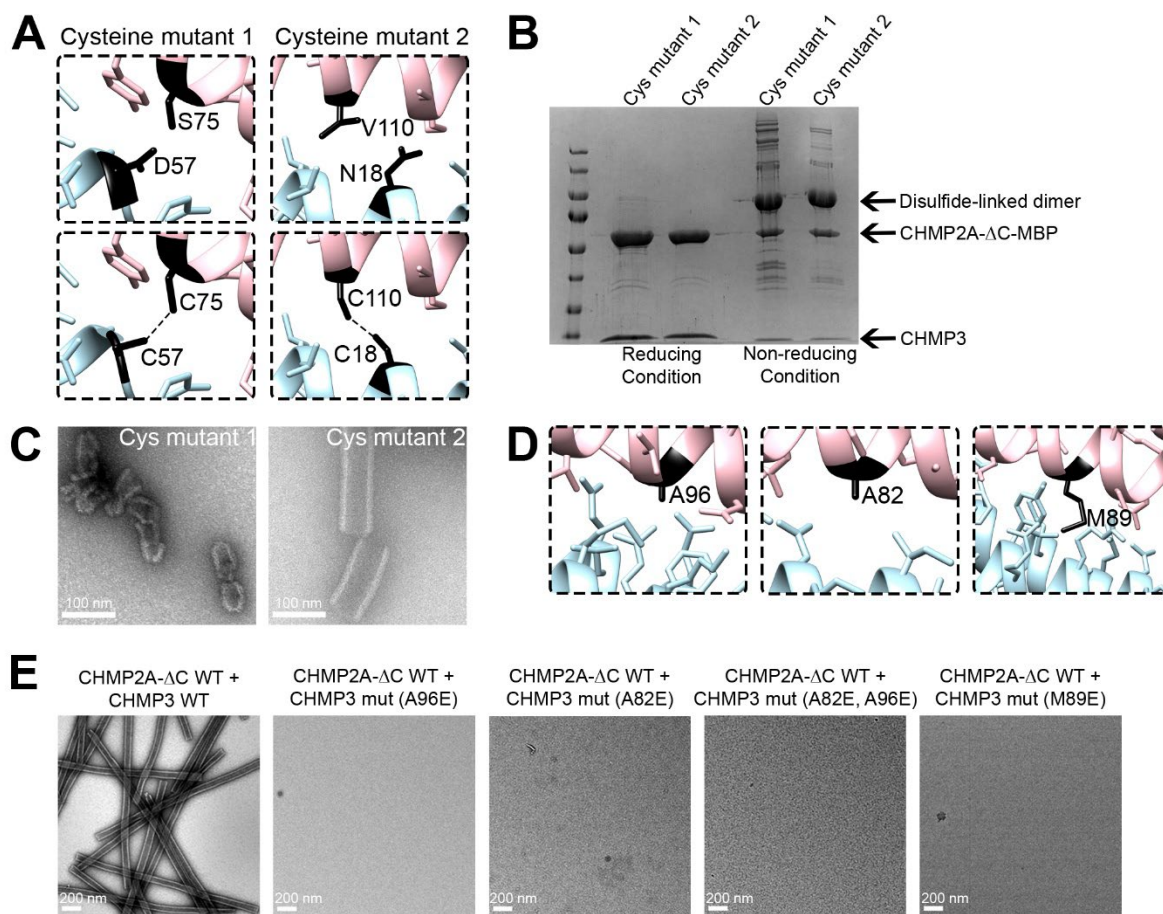

964  
965  
966 **Figure S5: Structure-based mutagenesis of CHMP2A-CHMP3 heterodimer formation and**  
967 **polymerization *in vitro*.**  
968 **(A)** Close-up views of the pairs of residues (black) mutated to cysteine to induce the formation of  
969 disulfide-linked CHMP2A (light blue) - CHMP3 (pink) heterodimers upon polymerization.  
970 **(B)** Cysteine cross-linking of the CHMP2A-CHMP3 heterodimer. Mutant CHMP2A\_D57C was  
971 incubated with CHMP3\_S75C and CHMP2A\_N18C with CHMP3\_V110C to induce polymerization  
972 as reported for wild-type CHMP2A and CHMP3 (Lata et al., 2008b). SDS-PAGE analysis showing  
973 that both CHMP2A\_D57C-CHMP3\_S75C and CHMP2A\_N18C-CHMP3\_V110C formed disulfide-  
974 linked dimers under non-reducing SDS PAGE conditions.  
975 **(C)** Negative staining electron micrographs showing regular tube formation for CHMP2A\_N18C-  
976 CHMP3\_V110C (right), while CHMP2A\_D57C-CHMP3\_S75C (left) produced only shorter tubes.  
977 Scale bar, 100 nm.  
978 **(D)** Close-up views of the CHMP3 interface residues A96, A82 and M89E tested for heterodimer  
979 formation and polymerization.  
980 **(E)** Negative staining electron micrographs of CHMP2A-CHMP3 wild-type and mutants  
981 (CHMP3\_A96E, CHMP3\_A82E, CHMP3-A82E\_A96E and CHMP3\_M89E) assemblies as  
982 indicated. Scale bar, 200 nm.  
983  
984

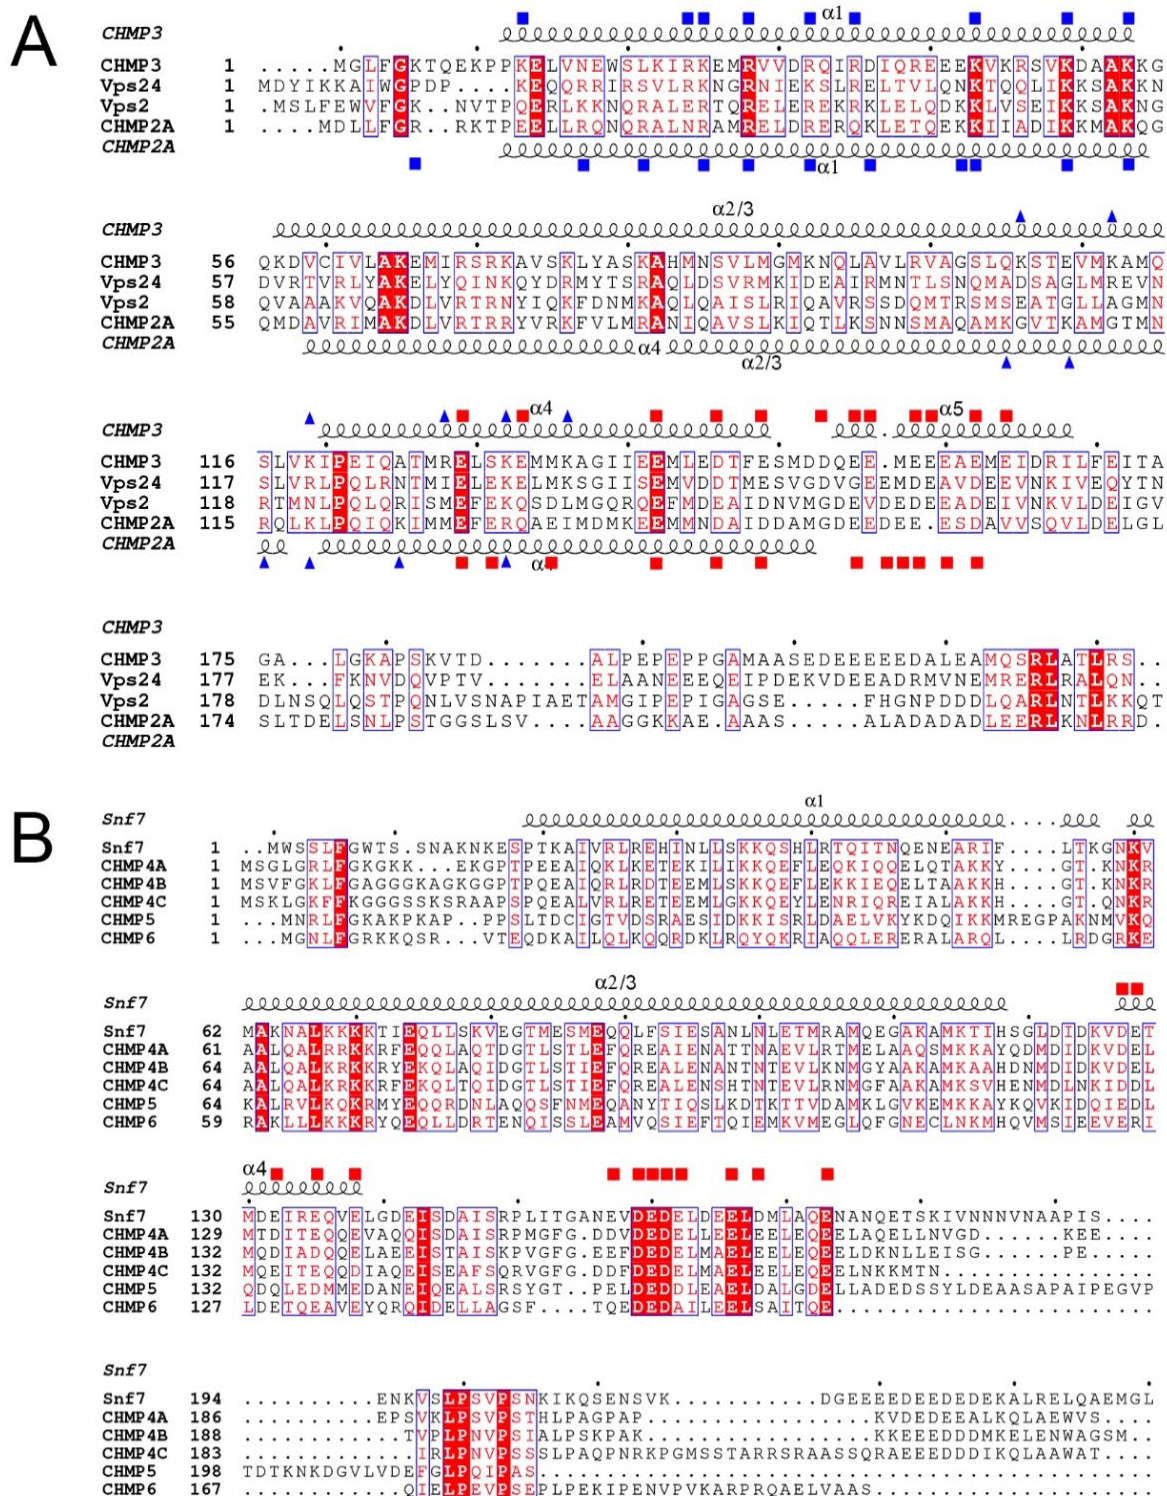

985  
 986  
 987 **Figure S6: ESCRT-III sequence alignment.**  
 988 (A) Sequence alignment of CHMP3 (AF219226), *S. cerevisiae* Vps24 (QHB09957), *S. cerevisiae*  
 989 Vps2 (P36108.2) and CHMP2A (NM\_198426.3). Secondary structure elements are shown for  
 990 CHMP3 above the sequence and for CHMP2A below the sequence alignment. Blue triangles

991 indicate basic residues of CHMP3 (above) and CHMP2A (below) exposed at the membrane  
992 binding interface. Blue rectangles show basic residues and red squares conserved acidic residues  
993 exposed at the interface between filaments.  
994 **(B)** Sequence alignment of *S. cerevisiae* Snf7 (Z73197.1) and its secondary structure (pdb 5FD9),  
995 CHMP4A (NM\_014169.5), CHMP4B (NM\_176812.5) CHMP4C (NM\_152284), CHMP5  
996 (NM\_016410.6) and CHMP6 (NM\_024591.5). Conserved acidic residues implicated in inter-  
997 filament interactions in the CHMP2A-CHMP3 polymer are indicated as red squares.  
998



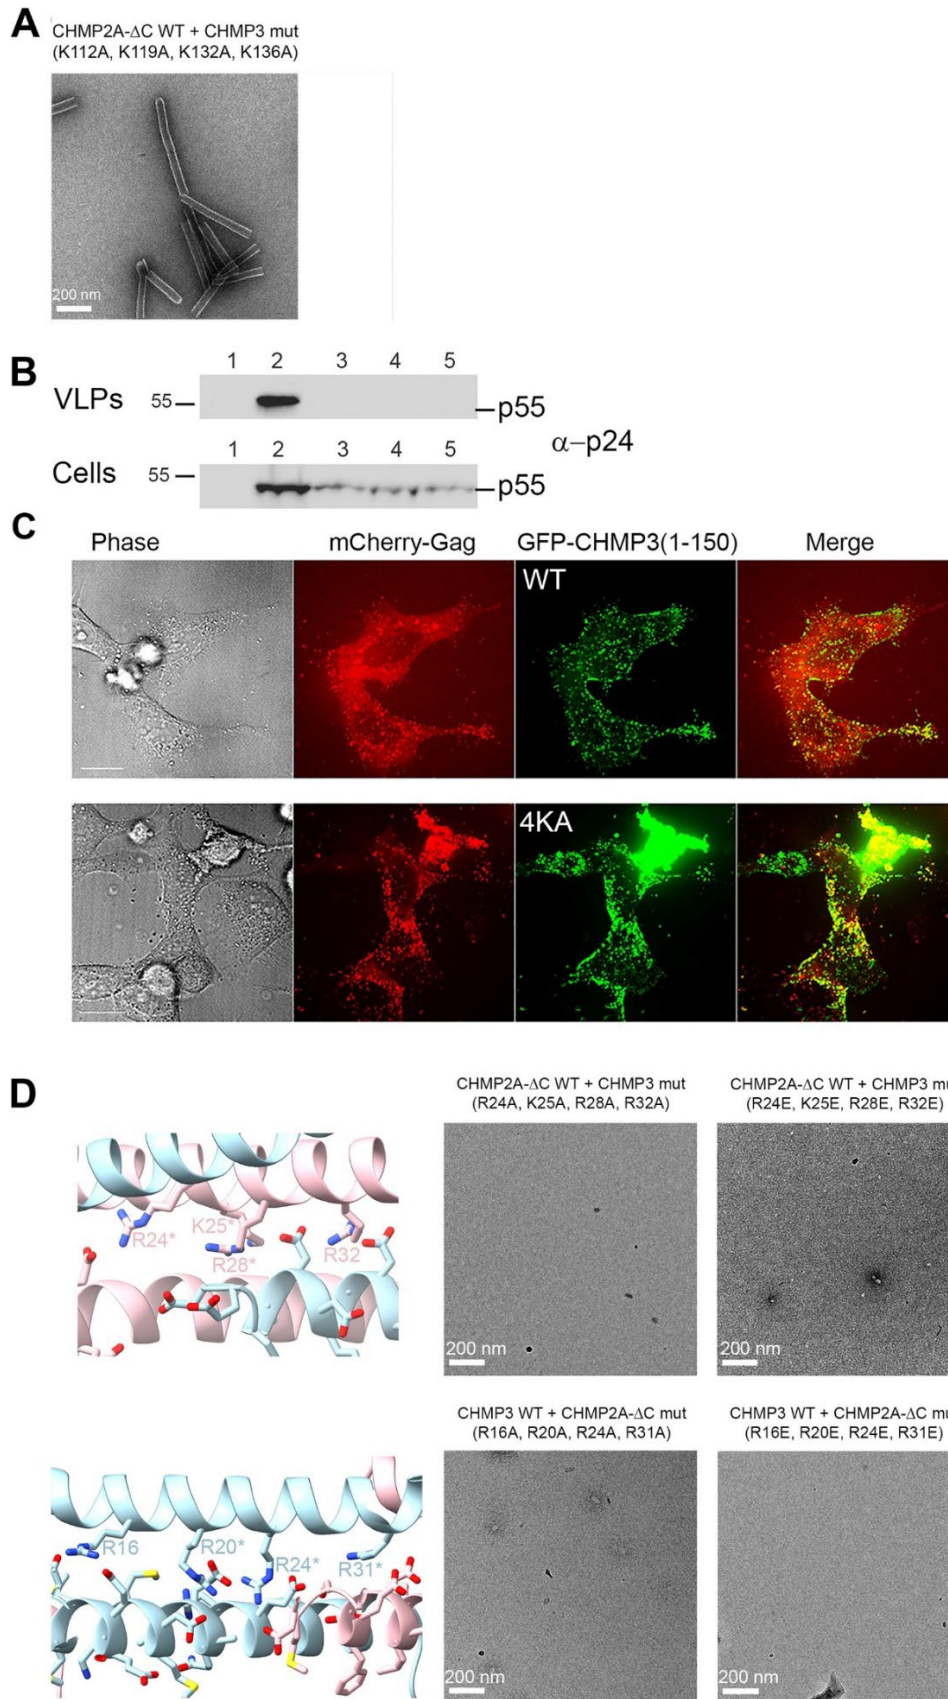

1000 **Figure S7: Structure-based mutagenesis of CHMP2A-CHMP3 polymer formation**  
1001 **(A)** Negative staining electron micrograph showing regular tube formation by CHMP2A-  
1002 CHMP3\_K112A, K119A, K132A, K136A polymerization. Scale bar, 200 nm.  
1003 **(B)** The substitution of four basic residues in GFP-CHMP3(1–150) 4KA (K112A, K119A, K132A,  
1004 K136A) does not diminish its dominant-negative effect on HIV-1 budding. Western blot analyses  
1005 of Gag released from Gag expressing cells as Gag-VLPs (upper panel) and detection of Gag in  
1006 total cell extracts (lower panel): lane 1, Gag expression; lane 2, Gag and GFP-VPS4A E228Q  
1007 expression; lane 3, Gag and GFP-CHMP3(1-150) expression; lane 4, Gag and GFP-CHMP3(1-  
1008 150) 4KA expression.  
1009 **(C)** Representative fluorescence images of HeLa cells transfected with Gag/mCherry-Gag and  
1010 CHMP3(1-150) or CHMP3(1-150)4KA. Cellular distribution of wild-type and mutant KA GFP-  
1011 CHMP3(1–150) indicates predominantly plasma membrane and intracellular localization as well  
1012 as co-localization with mCherry-Gag. Scale bar, 10  $\mu$ m.  
1013 **(D)** Negative staining electron micrographs showing no polymer formation of CHMP3 mutants  
1014 (upper left panel, close-up of a ribbon diagram illustrating the interface residues) R24A, K25A,  
1015 R28A, R32A (upper middle panel) and R24E, K25E, R28E, R32E (upper right panel) with  
1016 CHMP2A. (Lower panel) CHMP2A mutants (lower left panel, close-up of a ribbon diagram  
1017 illustrating the interface residues) R16A, R20A, R24A, R31A (lower middle panel) and R16E,  
1018 R20E, R24E, R31E (lower right panel) did not polymerize with CHMP3 *in vitro*. Scale bar, 200 nm.  
1019  
1020

1021

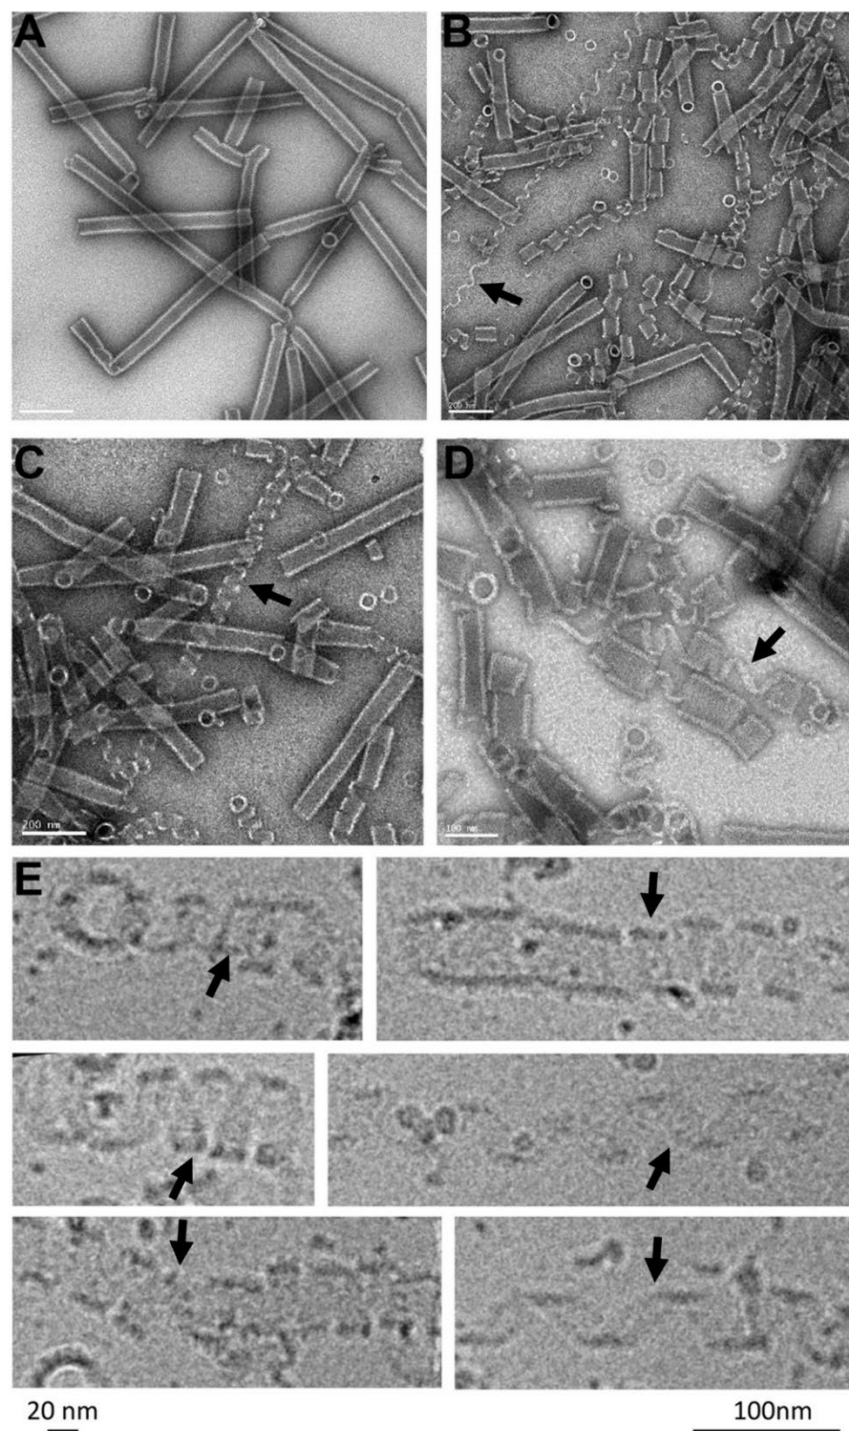

1022

1023 **Figure S8: High ionic strength unwinds the CHMP2A-CHMP3 filaments.**

1024 (A) Negative staining electron micrographs showing CHMP2A-CHMP3 wild-type polymers after  
1025 treatment with 1M NaCl (B, C) and 1M KCl (D).

1026 (E) Close-up of cryo-EM images shows unwinding of ~20 nm wide filaments corresponding to the  
1027 six-start helix observed in the structure. Single and multi-stranded unwound filaments are  
1028 indicated by arrows.

1029

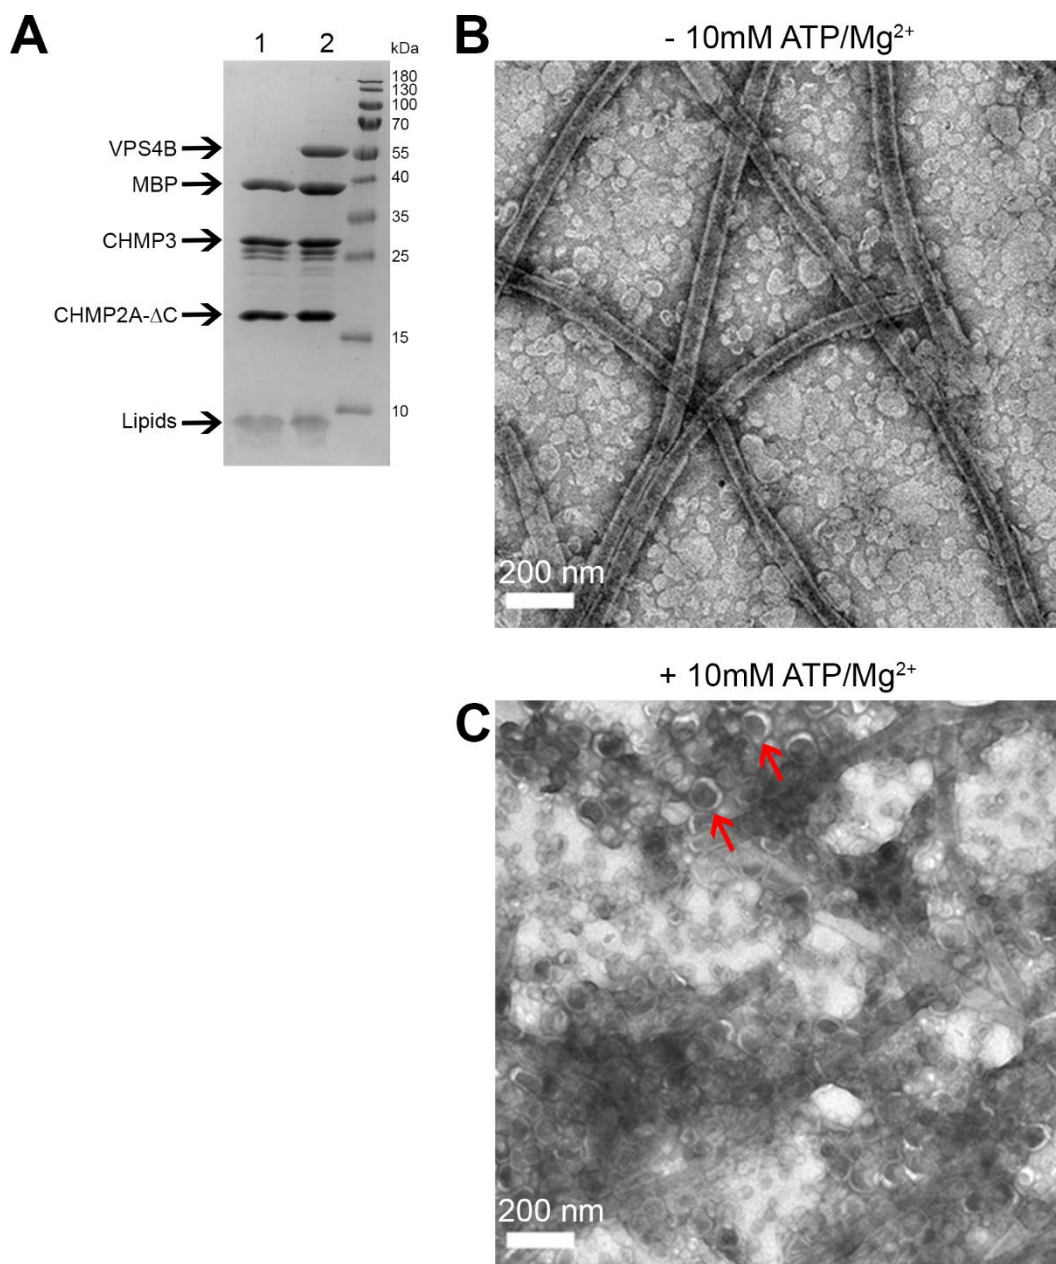

1030

1031 **Figure S9: Incorporation of VPS4B and ATP into CHMP2A-CHMP3 membrane tubes**  
1032 **induces their disassembly.**

1033 (A) SDS-PAGE analyses of purified CHMP2A-CHMP3 polymers; lane 1, CHMP2A-CHMP3  
1034 polymers cleaved with TEV and coated with a lipid bilayer; lane 2 CHMP2A-CHMP3 polymers,  
1035 TEV cleaved and incorporation of VPS4B prior to lipid bilayer coating.

1036 Negative staining electron micrographs of CHMP2A-CHMP3-VPS4B membrane-coated polymers  
1037 before (B) and after (C) incubation with ATP and Mg<sup>2+</sup>. Red arrows point to membrane vesicles  
1038 resulting from tube cleavage. Scale bar, 200 nm.

1039

### A + caged ATP

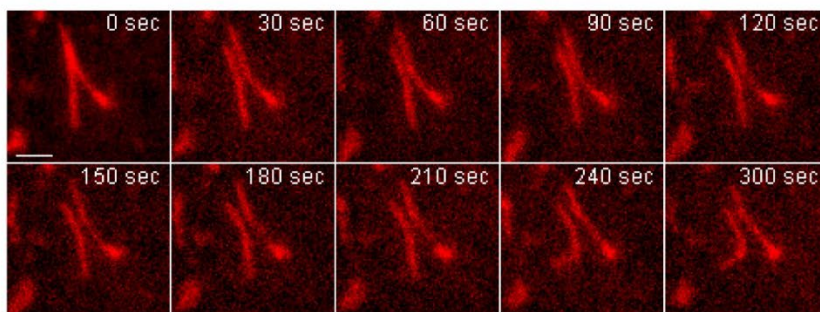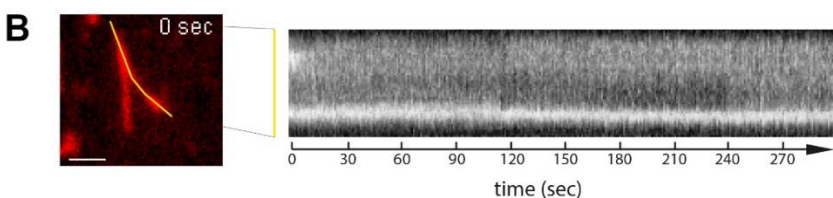

### C + VPS4B and caged ATP

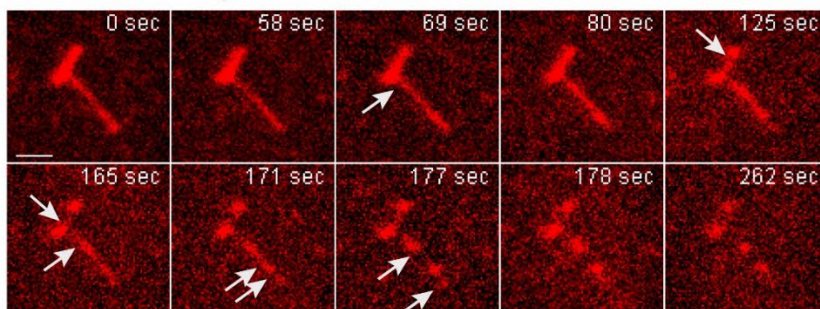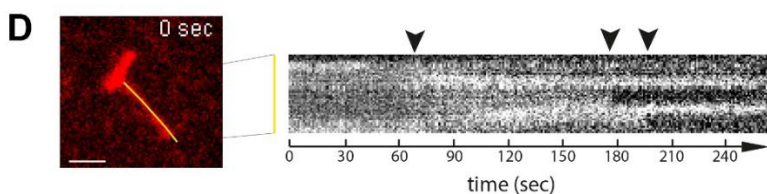

1040  
1041 **Figure S10: Imaging of VPS4B and ATP induced cleavage of CHMP2A-CHMP3 membrane**  
1042 **coated tubes.**  
1043 **(A)** A CHMP2A-CHMP3-caged ATP membrane coated tube was activated at 365 nm (365 nm  
1044 30%, 100 ms at each time point) to uncage ATP and imaged over 282s, which indicated that  
1045 uncaging did not change the tube structure (movie S3).  
1046 **(B)** The kymograph of the tube (yellow line) shows that the tube stays intact over the imaging time.  
1047 **(C)** Imaging of a CHMP2A-CHMP3-VPS4B-caged ATP membrane-coated tube following ATP  
1048 uncaging (365 nm, 30%, 100 ms at each time point) reveals cleavage of the tube at several sites  
1049 over the imaging time (movie S5). Scale Bar, 1 $\mu$ m.  
1050 **(D)** The kymograph of the tube (yellow line) indicates tube cleavage (arrows) over the imaging  
1051 time.  
1052  
1053

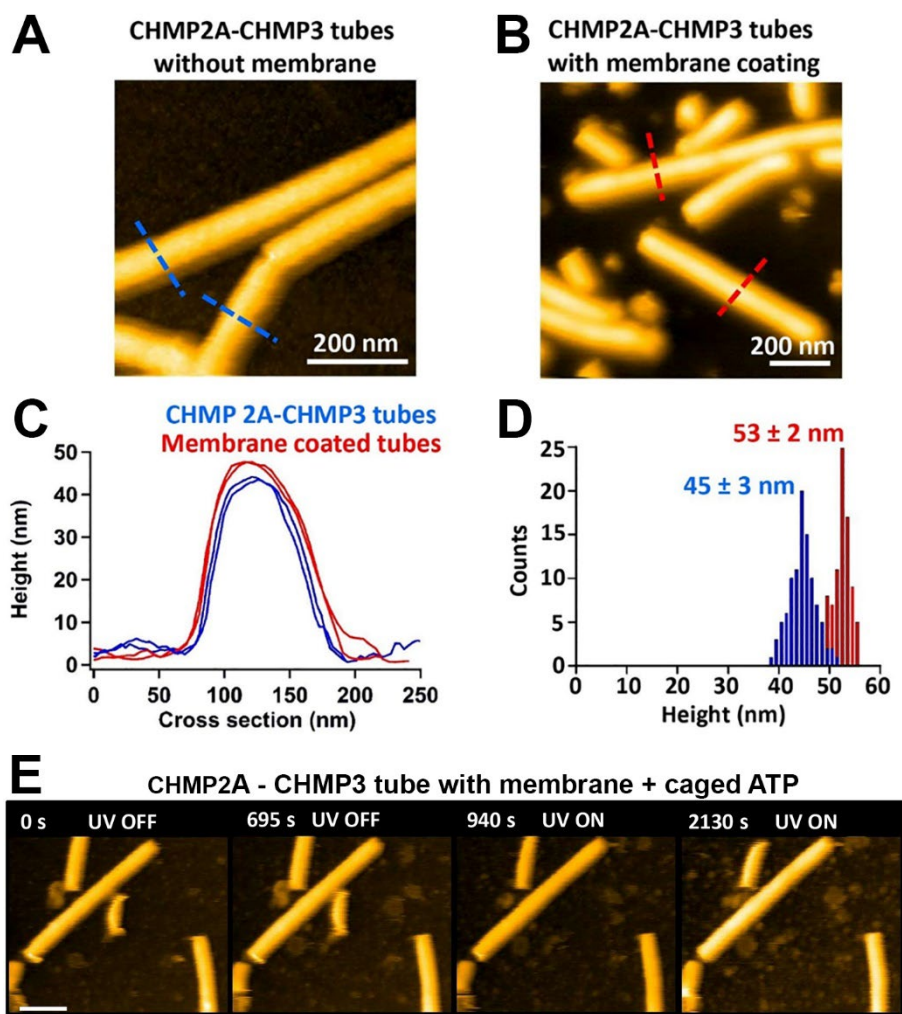

1054  
1055  
1056 **Figure S11. Height distribution of CHMP2A-CHMP3 tubes with and without membrane-**  
1057 **coating.**  
1058 **(A)** AFM image of CHMP2A-CHMP3 tubes without membrane.  
1059 **(B)** AFM image of CHMP2A-CHMP3 tubes coated with membrane.  
1060 **(C)** Cross-section of AFM images of CHMP2A-CHMP3 in panel A (blue dotted line) and panel B  
1061 (red dotted line).  
1062 **(D)** Height histogram of CHMP2A-CHMP3 tubes with (red) and without (blue) membrane coating  
1063 with respect to the surface.  
1064 **(E)** Snapshots HS-AFM images of membrane-coated tubes loaded with 10 mM caged ATP taken  
1065 with and without UV irradiation. The UV was turned on from 700 s onwards. Scale bar, 200 nm.  
1066  
1067

1068 **Movies**

1069  
1070 **Movie 1: Fluorescence microscopy imaging of CHMP2A-CHMP3 membrane coated tubes.**  
1071 A CHMP2A-CHMP3-caged ATP membrane-coated tube was activated at 365 nm for 10s to  
1072 uncage ATP and imaged over 291s.

1073 **Movie 2: Fluorescence microscopy imaging of CHMP2A-CHMP3 membrane coated tubes.**  
1074 Another dataset of CHMP2A-CHMP3-caged ATP membrane-coated tube activated at 365 nm for  
1075 100 ms at each time point to uncage ATP and imaged over 300s.

1076 **Movie 3: Fluorescence microscopy imaging of CHMP2A-CHMP3 membrane coated tubes.**  
1077 A CHMP2A-CHMP3-VPS4B membrane-coated tube was activated at 365 nm for 10s to uncage  
1078 ATP and imaged over 251s.

1079 **Movie 4: Fluorescence microscopy imaging of CHMP2A-CHMP3 membrane coated tubes.**  
1080 Imaging of a CHMP2A-CHMP3-VPS4B-caged ATP membrane-coated tube following ATP  
1081 uncaging (365 nm, 10s). This demonstrates tube fission followed by a shrinking event from both  
1082 sides

1083 **Movie 5: Fluorescence microscopy imaging of CHMP2A-CHMP3 membrane coated tubes.**  
1084 Another dataset of CHMP2A-CHMP3-VPS4B-caged ATP membrane-coated tube following ATP  
1085 uncaging (365 nm, 100 ms at each time point) reveals cleavage of the tube at several sites over  
1086 the imaging time.

1087 **Movie 6: Fluorescence microscopy imaging of CHMP2A-CHMP3 membrane coated tubes.**  
1088 Imaging of a CHMP2A-CHMP3-VPS4B-caged ATP membrane-coated tube following ATP  
1089 uncaging (365 nm) showing at 36s a shrinking event from the end of a tube and at 51s a cleavage  
1090 of the tube.

1091 **Movie 7: HS-AFM imaging of CHMP2A-CHMP3 membrane-coated tubes.** HS-AFM movie of  
1092 membrane-coated CHMP2A-CHMP3 tubes loaded with 10 mM caged ATP, taken before and after  
1093 UV (365 nm) irradiation. Imaging time 5 seconds/frame.

1094 **Movie 8: HS-AFM imaging of CHMP2A-CHMP3 membrane-coated tubes.** HS-AFM movie of  
1095 membrane-coated CHMP2A-CHMP3 tubes loaded with 5  $\mu$ M VPS4B and 10 mM caged ATP,  
1096 taken without UV irradiation. Imaging time 3 seconds/frame.

1097 **Movie 9: HS-AFM imaging of CHMP2A-CHMP3 membrane-coated tubes.** HS-AFM movie of  
1098 membrane-coated CHMP2A-CHMP3 tubes loaded with 5  $\mu$ M VPS4B and 10 mM caged ATP,  
1099 taken with 365 nm UV irradiation. Imaging time 2 seconds/frame.

1100

1101

1102

1103 **Table S1 – Cryo-EM data collection, refinement and validation statistics**

|                                                               | Membrane-bound CHMP2A + CHMP3<br>(Tube Diameter 430 Å)<br>(EMD-14630, PDB 7ZCG ) | Membrane-bound CHMP2A + CHMP3<br>(Tube Diameter 410 Å)<br>(EMD-14631, PDB 7ZCH) |
|---------------------------------------------------------------|----------------------------------------------------------------------------------|---------------------------------------------------------------------------------|
| <b>Data collection and processing</b>                         |                                                                                  |                                                                                 |
| Magnification                                                 | 130,000x                                                                         | 130,000x                                                                        |
| Voltage (kV)                                                  | 300                                                                              | 300                                                                             |
| Electron exposure per frame (e <sup>-</sup> /Å <sup>2</sup> ) | 0.96                                                                             | 0.96                                                                            |
| Number of frames                                              | 25                                                                               | 25                                                                              |
| Defocus range (µm)                                            | 0.5-1.5                                                                          | 0.5-1.5                                                                         |
| Pixel size (Å)                                                | 1.052                                                                            | 1.052                                                                           |
| Refined helical symmetry                                      | 54.37°, 2.74 Å                                                                   | 57.04°, 1.44 Å                                                                  |
| Point group symmetry                                          | C2                                                                               | C1                                                                              |
| Initial particle images (no.)                                 | 45,847                                                                           | 80,524                                                                          |
| Final particle images (no.)                                   | 25,353                                                                           | 11,396                                                                          |
| Map resolution (Å)                                            | 3.3                                                                              | 3.6                                                                             |
| FSC threshold                                                 | 0.143                                                                            | 0.143                                                                           |
| <b>Refinement</b>                                             |                                                                                  |                                                                                 |
| Initial model used (PDB code)                                 | <i>de novo</i>                                                                   | <i>de novo</i>                                                                  |
| Model resolution (Å)                                          | 3.6                                                                              | 4.0                                                                             |
| FSC threshold                                                 | 0.5                                                                              | 0.5                                                                             |
| Map sharpening <i>B</i> factor (Å <sup>2</sup> )              | -96.57                                                                           | -101.52                                                                         |
| Model-to-map fit                                              |                                                                                  |                                                                                 |
| Correlation coefficient, CC (mask)                            | 0.80                                                                             | 0.77                                                                            |
| Model Composition                                             |                                                                                  |                                                                                 |
| Chains                                                        | 22                                                                               | 22                                                                              |
| Nonhydrogen atoms                                             | 27,148                                                                           | 27,148                                                                          |
| Protein residues                                              | 3,366                                                                            | 3,366                                                                           |
| <i>B</i> factor (Å <sup>2</sup> )                             |                                                                                  |                                                                                 |
| Protein                                                       | 74.18                                                                            | 90.17                                                                           |
| R.m.s. deviations                                             |                                                                                  |                                                                                 |
| Bond lengths (Å)                                              | 0.004                                                                            | 0.004                                                                           |
| Bond angles (°)                                               | 0.758                                                                            | 0.762                                                                           |
| Validation                                                    |                                                                                  |                                                                                 |
| MolProbity score                                              | 1.86                                                                             | 1.89                                                                            |
| Clashscore                                                    | 15.23                                                                            | 21.23                                                                           |
| Rotamer outliers (%)                                          | 0.00                                                                             | 0.00                                                                            |
| Cbeta deviations (%)                                          | 0.00                                                                             | 0.00                                                                            |
| Ramachandran plot                                             |                                                                                  |                                                                                 |
| Favored (%)                                                   | 97.02                                                                            | 97.68                                                                           |
| Allowed (%)                                                   | 2.98                                                                             | 2.32                                                                            |
| Disallowed (%)                                                | 0.00                                                                             | 0.00                                                                            |

1104

1105
